# Supplementary material for: Alternative polyadenylation factor CPSF6 regulates temperature compensation of the mammalian circadian clock
Source: PLoS Biol. 2023 Jun 28;21(6):e3002164. doi: 10.1371/journal.pbio.3002164 (PMC10335657; doi:10.1371/journal.pbio.3002164)
Supplement: S2 Table — Columns A-F depict the chromosome information, the start and end position of the polyadenylation site, the corresponding gene symbol, ESAT score, and strand information, respectively, of the polyadenylation site found by our RNAseH-seq approach. (XLSX) [file pbio.3002164.s015.xlsx]

## Sheet: exact_3ends_collapse
chr	start	end	symbol	score	strand
chr5	141369257	141369258	RNF14	8	+
chr5	141368744	141368745	RNF14	22	+
chr5	141367980	141367981	RNF14	13	+
chr5	141367603	141367604	RNF14	104	+
chr1	154518568	154518569	UBE2Q1	19	-
chr1	154521054	154521055	UBE2Q1	22	-
chr1	154522461	154522462	UBE2Q1	855	-
chr1	154522570	154522571	UBE2Q1	43	-
chr1	154522650	154522651	UBE2Q1	43	-
chr1	154525544	154525545	UBE2Q1	16	-
chr15	76193380	76193381	UBE2Q2	249	+
chr15	76192635	76192636	UBE2Q2	47	+
chr15	76192333	76192334	UBE2Q2	55	+
chr15	76192053	76192054	UBE2Q2	42	+
chr15	76171487	76171488	UBE2Q2	26	+
chr15	76165849	76165850	UBE2Q2	14	+
chr12	121015390	121015391	RNF10	77	+
chr12	121014973	121014974	RNF10	37	+
chr12	121014688	121014689	RNF10	419	+
chr12	121014555	121014556	RNF10	45	+
chr12	121013702	121013703	RNF10	26	+
chr1	51738927	51738928	RNF11	34	+
chr1	51738774	51738775	RNF11	307	+
chr1	51738315	51738316	RNF11	21	+
chr1	51737459	51737460	RNF11	204	+
chr1	51737243	51737244	RNF11	30	+
chr3	149679913	149679914	RNF13	180	+
chr3	149679785	149679786	RNF13	9	+
chr3	149679148	149679149	RNF13	11	+
chr7	72621334	72621335	GTF2IP1	698	+
chr7	72621213	72621214	GTF2IP1	41	+
chr7	72621150	72621151	GTF2IP1	37	+
chr7	72620763	72620764	GTF2IP1	154	+
chr7	72620698	72620699	GTF2IP1	231	+
chr7	72620615	72620616	GTF2IP1	379	+
chr7	72620359	72620360	GTF2IP1	90	+
chr7	72620267	72620268	GTF2IP1	65	+
chr14	23358505	23358506	REM2	21	+
chr14	23356887	23356888	REM2	10	+
chr7	130610696	130610697	LOC100506860	7	+
chr7	130606704	130606705	LOC100506860	97	+
chr7	72621334	72621335	GTF2IP4	698	+
chr7	72621213	72621214	GTF2IP4	41	+
chr7	72621150	72621151	GTF2IP4	37	+
chr7	72620763	72620764	GTF2IP4	154	+
chr7	72620698	72620699	GTF2IP4	231	+
chr7	72620615	72620616	GTF2IP4	379	+
chr7	72620359	72620360	GTF2IP4	90	+
chr7	72620267	72620268	GTF2IP4	65	+
chr7	75720954	75720955	GTF2IP7	5	-
chr10	105008227	105008228	RPEL1	21	+
chr10	105007471	105007472	RPEL1	18	+
chr10	105006836	105006837	RPEL1	15	+
chr10	105006585	105006586	RPEL1	872	+
chr19	52392505	52392506	ZNF649	6	-
chr19	52392612	52392613	ZNF649	4	-
chr19	52394117	52394118	ZNF649	4	-
chr1	192977856	192977857	UCHL5	10	-
chr1	192978057	192978058	UCHL5	5	-
chr1	192984614	192984615	UCHL5	9	-
chr1	192984895	192984896	UCHL5	13	-
chr1	192985120	192985121	UCHL5	13	-
chr1	192985274	192985275	UCHL5	93	-
chr1	192985400	192985401	UCHL5	6	-
chr1	192990232	192990233	UCHL5	5	-
chr2	132241548	132241549	MZT2A	7735	-
chr2	130948285	130948286	MZT2B	8851	+
chr2	130948217	130948218	MZT2B	308	+
chrX	76760978	76760979	ATRX	12	-
chrX	76761192	76761193	ATRX	303	-
chrX	76761256	76761257	ATRX	32	-
chrX	76762071	76762072	ATRX	42	-
chrX	76762402	76762403	ATRX	171	-
chrX	76763346	76763347	ATRX	241	-
chrX	76763468	76763469	ATRX	42	-
chrX	76763801	76763802	ATRX	24	-
chrX	76849197	76849198	ATRX	31	-
chrX	76854896	76854897	ATRX	32	-
chrX	76855043	76855044	ATRX	77	-
chrX	76855204	76855205	ATRX	220	-
chr16	8943182	8943183	PMM2	389	+
chr22	41972907	41972908	PMM1	829	-
chr9	133381124	133381125	ASS1	35	+
chr9	133378922	133378923	ASS1	25	+
chr9	133377374	133377375	ASS1	20	+
chr9	133376641	133376642	ASS1	1170	+
chr9	133376590	133376591	ASS1	117	+
chr9	133364786	133364787	ASS1	26	+
chr16	89710846	89710847	CHMP1A	2101	-
chr16	89711327	89711328	CHMP1A	201	-
chr12	59210034	59210035	LOC100506869	174	+
chr12	21690257	21690258	SPX	6	+
chr12	21684210	21684211	SPX	71	+
chr19	12572001	12572002	ZNF709	3	-
chr19	12572373	12572374	ZNF709	9	-
chr19	12576424	12576425	ZNF709	3	-
chr19	21473963	21473964	ZNF708	7	-
chr5	178461383	178461384	ZNF879	11	+
chr5	178461228	178461229	ZNF879	10	+
chr3	196662279	196662280	NCBP2	277	-
chr3	196663726	196663727	NCBP2	1901	-
chr5	38688298	38688299	OSMR-AS1	11	-
chr5	38796466	38796467	OSMR-AS1	10	-
chr8	37557532	37557533	ZNF703	923	+
chr8	37557159	37557160	ZNF703	23	+
chr8	37556390	37556391	ZNF703	214	+
chr2	73119286	73119287	SPR	1158	+
chr2	73119019	73119020	SPR	36	+
chr19	12061964	12061965	ZNF700	12	+
chr19	12061577	12061578	ZNF700	28	+
chr8	144778577	144778578	ZNF707	103	+
chr8	144777526	144777527	ZNF707	217	+
chr5	110820746	110820747	CAMK4	4	+
chr5	110820309	110820310	CAMK4	52	+
chr8	81537803	81537804	ZNF704	17	-
chr8	81540687	81540688	ZNF704	53	-
chr8	81547646	81547647	ZNF704	7	-
chr8	81548733	81548734	ZNF704	114	-
chr8	81548894	81548895	ZNF704	8	-
chr8	81549775	81549776	ZNF704	29	-
chr8	81550769	81550770	ZNF704	36	-
chr8	81552432	81552433	ZNF704	75	-
chr8	81553491	81553492	ZNF704	14	-
chr12	56518041	56518042	ZC3H10	7	+
chr12	56516278	56516279	ZC3H10	26	+
chr20	48574240	48574241	RNF114	29	+
chr20	48570415	48570416	RNF114	82	+
chr20	48568747	48568748	RNF114	872	+
chr20	48565876	48565877	RNF114	30	+
chr20	48562754	48562755	RNF114	22	+
chr20	48561975	48561976	RNF114	16	+
chr1	145690653	145690654	RNF115	40	+
chr1	145689611	145689612	RNF115	20	+
chr1	145688798	145688799	RNF115	39	+
chr1	145688619	145688620	RNF115	407	+
chr1	145688510	145688511	RNF115	16	+
chr1	145688346	145688347	RNF115	121	+
chr2	187374085	187374086	ZC3H15	309	+
chr2	187373428	187373429	ZC3H15	16	+
chr2	187370568	187370569	ZC3H15	26	+
chr2	187370260	187370261	ZC3H15	37	+
chr2	187368884	187368885	ZC3H15	126	+
chr2	187367289	187367290	ZC3H15	28	+
chr14	89079323	89079324	ZC3H14	23	+
chr14	89078213	89078214	ZC3H14	439	+
chr16	29686377	29686378	SPN	4	+
chr16	29681647	29681648	SPN	4	+
chr16	29676837	29676838	SPN	3	+
chr16	29676636	29676637	SPN	4	+
chr15	59392889	59392890	RNF111	20	+
chr15	59388623	59388624	RNF111	37	+
chr15	59388157	59388158	RNF111	16	+
chr15	59387303	59387304	RNF111	100	+
chr8	102381879	102381880	NACAP1	8121	+
chr8	102381596	102381597	NACAP1	102	+
chr16	88698371	88698372	ZC3H18	140	+
chr16	88698255	88698256	ZC3H18	66	+
chr16	88698192	88698193	ZC3H18	85	+
chr16	88698133	88698134	ZC3H18	35	+
chr16	88697813	88697814	ZC3H18	39	+
chr16	88694190	88694191	ZC3H18	15	+
chr16	88644086	88644087	ZC3H18	22	+
chr9	140063219	140063220	GRIN1	39	+
chr17	54957114	54957115	MTVR2	15	-
chr17	54960683	54960684	MTVR2	6	-
chr3	165232558	165232559	LINC01322	11	+
chr17	41621831	41621832	DHX8	9	+
chr17	41604154	41604155	DHX8	56	+
chr17	41601684	41601685	DHX8	255	+
chr1	182856882	182856883	DHX9	251	+
chr1	182856778	182856779	DHX9	73	+
chr1	182856684	182856685	DHX9	49	+
chr1	182856579	182856580	DHX9	15	+
chr7	26536342	26536343	LOC441204	4	+
chr7	26533963	26533964	LOC441204	3	+
chr5	149779852	149779853	TCOF1	330	+
chr5	149779614	149779615	TCOF1	57	+
chr5	149779481	149779482	TCOF1	63	+
chr5	149777999	149778000	TCOF1	80	+
chr5	149776405	149776406	TCOF1	160	+
chr5	149776152	149776153	TCOF1	12	+
chr5	149764199	149764200	TCOF1	30	+
chr5	149763814	149763815	TCOF1	191	+
chr5	149743769	149743770	TCOF1	21	+
chr17	28513485	28513486	NSRP1	17	+
chr17	28513282	28513283	NSRP1	17	+
chr17	28513011	28513012	NSRP1	9	+
chr17	28512844	28512845	NSRP1	11	+
chr17	28512783	28512784	NSRP1	15	+
chr17	28512150	28512151	NSRP1	10	+
chr17	28508032	28508033	NSRP1	7	+
chr17	28506162	28506163	NSRP1	19	+
chr17	28505166	28505167	NSRP1	15	+
chr19	48882079	48882080	SYNGR4	29	+
chr19	48881206	48881207	SYNGR4	5	+
chr3	14186650	14186651	XPC	227	-
chr3	14186805	14186806	XPC	75	-
chr3	14187501	14187502	XPC	12	-
chr12	53815109	53815110	SP1	9	+
chr12	53810891	53810892	SP1	7	+
chr12	53810224	53810225	SP1	51	+
chr12	53810124	53810125	SP1	28	+
chr12	53809916	53809917	SP1	15	+
chr12	53809853	53809854	SP1	15	+
chr12	53809423	53809424	SP1	89	+
chr12	53807212	53807213	SP1	10	+
chr12	53806946	53806947	SP1	9	+
chr12	53806823	53806824	SP1	43	+
chr12	53805417	53805418	SP1	82	+
chr8	145067583	145067584	GRINA	2342	+
chr8	145067514	145067515	GRINA	195	+
chr8	145067350	145067351	GRINA	171	+
chr8	145067273	145067274	GRINA	167	+
chr8	145067176	145067177	GRINA	210	+
chr8	145067000	145067001	GRINA	120	+
chr8	145066766	145066767	GRINA	81	+
chr8	145066695	145066696	GRINA	117	+
chr2	174766448	174766449	SP3	27	-
chr2	174771188	174771189	SP3	19	-
chr2	174773264	174773265	SP3	32	-
chr2	174773443	174773444	SP3	10	-
chr2	174774259	174774260	SP3	9	-
chr2	174774480	174774481	SP3	29	-
chr2	174774656	174774657	SP3	60	-
chr2	174774882	174774883	SP3	13	-
chr7	21552922	21552923	SP4	20	+
chr7	21552240	21552241	SP4	10	+
chr7	21551276	21551277	SP4	5	+
chr7	21551148	21551149	SP4	14	+
chr7	21551083	21551084	SP4	5	+
chr2	171577228	171577229	SP5	4	+
chr17	45922280	45922281	SP6	26	-
chr3	49895422	49895423	CAMKV	30	-
chr12	121200319	121200320	SPPL3	16	-
chr12	121200415	121200416	SPPL3	14	-
chr12	121201623	121201624	SPPL3	36	-
chr12	121201699	121201700	SPPL3	22	-
chr12	121202077	121202078	SPPL3	34	-
chr12	121202263	121202264	SPPL3	167	-
chr12	121202427	121202428	SPPL3	16	-
chr3	167726475	167726476	GOLIM4	77	-
chr3	167726789	167726790	GOLIM4	18	-
chr3	167727116	167727117	GOLIM4	17	-
chr3	167727810	167727811	GOLIM4	144	-
chr3	167727990	167727991	GOLIM4	22	-
chr3	167728117	167728118	GOLIM4	9	-
chr3	167728547	167728548	GOLIM4	16	-
chr3	167742763	167742764	GOLIM4	16	-
chr19	46031027	46031028	OPA3	15	-
chr19	46050835	46050836	OPA3	5	-
chr19	46052412	46052413	OPA3	131	-
chr19	46054619	46054620	OPA3	10	-
chr19	46055802	46055803	OPA3	25	-
chr19	46056331	46056332	OPA3	10	-
chr19	46056466	46056467	OPA3	70	-
chr20	3895965	3895966	MIR103B2	13	-
chr3	193415313	193415314	OPA1	11	+
chr3	193412811	193412812	OPA1	133	+
chr3	193412666	193412667	OPA1	115	+
chr3	193412518	193412519	OPA1	373	+
chr16	679265	679266	RAB40C	373	+
chr17	80612850	80612851	RAB40B	18	-
chr17	80613357	80613358	RAB40B	5	-
chr17	80613845	80613846	RAB40B	9	-
chr17	80614949	80614950	RAB40B	8	-
chr17	80615194	80615195	RAB40B	7	-
chr17	80615265	80615266	RAB40B	8	-
chr14	64914192	64914193	ZBTB25	33	-
chr14	64916047	64916048	ZBTB25	35	-
chr14	64953557	64953558	ZBTB25	55	-
chr17	46147423	46147424	CBX1	1257	-
chr17	46147515	46147516	CBX1	73	-
chr17	46147638	46147639	CBX1	89	-
chr17	46148198	46148199	CBX1	22	-
chr17	46148413	46148414	CBX1	58	-
chr17	46153378	46153379	CBX1	25	-
chr16	31005307	31005308	HSD3B7	5	+
chr16	31003188	31003189	HSD3B7	12	+
chr16	31000467	31000468	HSD3B7	67	+
chr3	48601507	48601508	COL7A1	143	-
chr19	4835351	4835352	PLIN3	14	-
chr19	4836232	4836233	PLIN3	15	-
chr19	4838354	4838355	PLIN3	796	-
chr19	4838610	4838611	PLIN3	524	-
chr11	102655897	102655898	MMP1	6	-
chr22	46730188	46730189	GTSE1	43	+
chr22	46729723	46729724	GTSE1	33	+
chr22	46729593	46729594	GTSE1	636	+
chr22	46729505	46729506	GTSE1	27	+
chr22	46726706	46726707	GTSE1	97	+
chr22	46726381	46726382	GTSE1	596	+
chr22	46726215	46726216	GTSE1	26	+
chr22	46704529	46704530	GTSE1	40	+
chr1	43625436	43625437	FAM183A	7	+
chr1	43624834	43624835	FAM183A	4	+
chr1	43623555	43623556	FAM183A	22	+
chr1	43622065	43622066	FAM183A	27	+
chr20	62330809	62330810	ARFRP1	295	-
chr20	62331638	62331639	ARFRP1	35	-
chr11	36503141	36503142	TRAF6	7	-
chr11	36505328	36505329	TRAF6	13	-
chr11	36509598	36509599	TRAF6	47	-
chr11	36509798	36509799	TRAF6	6	-
chr11	36510491	36510492	TRAF6	15	-
chr11	36510723	36510724	TRAF6	7	-
chr11	36511020	36511021	TRAF6	21	-
chr19	2354797	2354798	SPPL2B	92	+
chr19	2354618	2354619	SPPL2B	9	+
chr19	2353926	2353927	SPPL2B	252	+
chr10	26501455	26501456	MYO3A	20	+
chr10	26457775	26457776	MYO3A	3	+
chr9	114697645	114697646	UGCG	39	+
chr9	114697551	114697552	UGCG	21	+
chr9	114695355	114695356	UGCG	78	+
chr9	114695162	114695163	UGCG	8	+
chr2	171515021	171515022	MYO3B	5	+
chr2	171509649	171509650	MYO3B	3	+
chr16	28918279	28918280	ATP2A1	13	+
chr16	28915784	28915785	ATP2A1	94	+
chr16	28905928	28905929	ATP2A1	3	+
chr12	110789935	110789936	ATP2A2	23	+
chr12	110788895	110788896	ATP2A2	36	+
chr12	110788779	110788780	ATP2A2	22	+
chr12	110785121	110785122	ATP2A2	264	+
chr12	110785038	110785039	ATP2A2	22	+
chr12	110784910	110784911	ATP2A2	25	+
chr12	110784590	110784591	ATP2A2	22	+
chr12	110784487	110784488	ATP2A2	50	+
chr12	110784308	110784309	ATP2A2	349	+
chr11	64890210	64890211	SYVN1	24	-
chr11	64894776	64894777	SYVN1	280	-
chr5	52249714	52249715	ITGA1	6	+
chr5	52248584	52248585	ITGA1	6	+
chr5	52248483	52248484	ITGA1	6	+
chr5	52248323	52248324	ITGA1	17	+
chr5	52390413	52390414	ITGA2	22	+
chr5	52390333	52390334	ITGA2	12	+
chr5	52388454	52388455	ITGA2	24	+
chr5	52386689	52386690	ITGA2	5	+
chr5	52386561	52386562	ITGA2	10	+
chr17	48167844	48167845	ITGA3	4928	+
chr17	48167695	48167696	ITGA3	146	+
chr17	48167524	48167525	ITGA3	55	+
chr12	54789053	54789054	ITGA5	1060	-
chr2	173370986	173370987	ITGA6	46	+
chr2	173370921	173370922	ITGA6	63	+
chr2	173369495	173369496	ITGA6	388	+
chr2	173369421	173369422	ITGA6	15	+
chr2	173369205	173369206	ITGA6	105	+
chr11	63318941	63318942	RARRES3	2	+
chr11	63313929	63313930	RARRES3	25	+
chr17	79163398	79163399	CEP131	954	-
chr17	79163544	79163545	CEP131	367	-
chr7_gl000195_random	42939	42940	LOC102724951	21	-
chr7_gl000195_random	43074	43075	LOC102724951	27	-
chr7_gl000195_random	43717	43718	LOC102724951	7	-
chr7_gl000195_random	43929	43930	LOC102724951	18	-
chr7_gl000195_random	44483	44484	LOC102724951	5	-
chr1	153897078	153897079	DENND4B	9	-
chr1	153901978	153901979	DENND4B	393	-
chr1	153902041	153902042	DENND4B	42	-
chr1	153902284	153902285	DENND4B	12	-
chr9	19374136	19374137	DENND4C	20	+
chr9	19373540	19373541	DENND4C	12	+
chr9	19373034	19373035	DENND4C	22	+
chr9	19372856	19372857	DENND4C	214	+
chr9	19372394	19372395	DENND4C	22	+
chr11	49998029	49998030	OR4C12	3	-
chr11	9775233	9775234	SWAP70	11	+
chr11	9773361	9773362	SWAP70	70	+
chr11	9772029	9772030	SWAP70	105	+
chr11	9771912	9771913	SWAP70	40	+
chr11	9769572	9769573	SWAP70	79	+
chr4	100224395	100224396	ADH1B	14	-
chr1	329259	329260	LOC100132287	41	+
chr1	328580	328581	LOC100132287	46	+
chr1	328437	328438	LOC100132287	682	+
chr1	328350	328351	LOC100132287	249	+
chr1	328286	328287	LOC100132287	100	+
chr1	328086	328087	LOC100132287	30	+
chr12	124800568	124800569	ZNF664-FAM101A	4	+
chr12	124458567	124458568	ZNF664-FAM101A	4	+
chr4	186316931	186316932	UFSP2	46	-
chr4	186319292	186319293	UFSP2	8	-
chr4	186320694	186320695	UFSP2	55	-
chr4	186321469	186321470	UFSP2	101	-
chr1	160902941	160902942	LOC101928372	3	+
chr3	115440268	115440269	GAP43	39	+
chr3	115440212	115440213	GAP43	12	+
chr3	115439894	115439895	GAP43	143	+
chr20	461759	461760	CSNK2A1	41	-
chr20	463340	463341	CSNK2A1	232	-
chr20	463477	463478	CSNK2A1	32	-
chr20	464457	464458	CSNK2A1	416	-
chr10	43009061	43009062	ZNF37BP	16	-
chr10	43011440	43011441	ZNF37BP	21	-
chr10	43014651	43014652	ZNF37BP	39	-
chr10	43015077	43015078	ZNF37BP	5	-
chr10	43015252	43015253	ZNF37BP	36	-
chr10	43015317	43015318	ZNF37BP	52	-
chr10	43016275	43016276	ZNF37BP	9	-
chr3	187899140	187899141	FLJ42393	22	+
chr7	102451640	102451641	FBXL13	16	-
chr7	102452455	102452456	FBXL13	15	-
chr7	102453308	102453309	FBXL13	96	-
chr7	102453683	102453684	FBXL13	279	-
chr7	102453788	102453789	FBXL13	14	-
chr19	9919882	9919883	FBXL12	10	-
chr19	9920608	9920609	FBXL12	5	-
chr19	9920947	9920948	FBXL12	75	-
chr5	175113243	175113244	HRH2	4	+
chr5	175110094	175110095	HRH2	19	+
chr12	1702085	1702086	FBXL14	5	-
chr12	1702442	1702443	FBXL14	5	-
chr12	1702839	1702840	FBXL14	6	-
chr5	107194740	107194741	FBXL17	22	-
chr5	107194873	107194874	FBXL17	19	-
chr5	107195119	107195120	FBXL17	39	-
chr5	107195628	107195629	FBXL17	12	-
chr5	107197199	107197200	FBXL17	103	-
chr3	11304938	11304939	HRH1	13	+
chr3	11304497	11304498	HRH1	52	+
chr3	11303977	11303978	HRH1	39	+
chr3	11303793	11303794	HRH1	20	+
chr3	11303522	11303523	HRH1	14	+
chr3	11302934	11302935	HRH1	34	+
chr3	11302450	11302451	HRH1	47	+
chr16	30960104	30960105	FBXL19	279	+
chr7	5511081	5511082	FBXL18	9	-
chr7	5513958	5513959	FBXL18	17	-
chr7	5514357	5514358	FBXL18	17	-
chr7	5515435	5515436	FBXL18	458	-
chr7	5515494	5515495	FBXL18	37	-
chr7	5516274	5516275	FBXL18	17	-
chr7	5516537	5516538	FBXL18	40	-
chr7	5520213	5520214	FBXL18	75	-
chr7	5520558	5520559	FBXL18	34	-
chr7	5528809	5528810	FBXL18	34	-
chr19	58893661	58893662	MIR4754	4	-
chr19	58893963	58893964	MIR4754	5	-
chr20	20370204	20370205	RALGAPA2	51	-
chr20	20370273	20370274	RALGAPA2	12	-
chr20	20370528	20370529	RALGAPA2	52	-
chr20	20372797	20372798	RALGAPA2	6	-
chr20	20372857	20372858	RALGAPA2	6	-
chr20	20373418	20373419	RALGAPA2	30	-
chr17	40338858	40338859	GHDC	25	-
chr17	40340781	40340782	GHDC	17	-
chr17	40341106	40341107	GHDC	775	-
chr7	87133180	87133181	ABCB1	37	-
chr7	87133311	87133312	ABCB1	24	-
chr7	87133603	87133604	ABCB1	5	-
chr7	87133663	87133664	ABCB1	7	-
chr7	4312386	4312387	SDK1	7	+
chr7	4308629	4308630	SDK1	112	+
chr7	4308549	4308550	SDK1	15	+
chr7	4306035	4306036	SDK1	55	+
chr7	4305929	4305930	SDK1	16	+
chr17	71333811	71333812	SDK2	231	-
chr17	71334070	71334071	SDK2	263	-
chr1	104113041	104113042	ACTG1P4	6	+
chr1	104112546	104112547	ACTG1P4	9	+
chr17	44274039	44274040	KANSL1-AS1	34	+
chr9	140086071	140086072	TPRN	313	-
chr15	72072880	72072881	THSD4	5	+
chr15	72070946	72070947	THSD4	47	+
chr1	112264693	112264694	FAM212B	78	-
chr1	112265426	112265427	FAM212B	197	-
chr1	112266459	112266460	FAM212B	62	-
chr1	112266521	112266522	FAM212B	67	-
chr1	112268361	112268362	FAM212B	18	-
chr1	112269130	112269131	FAM212B	61	-
chr3	49842459	49842460	FAM212A	26	+
chr18	24496125	24496126	CHST9	3	-
chr19	34264410	34264411	CHST8	3	+
chrX	107940769	107940770	COL4A5	19	+
chrX	107940089	107940090	COL4A5	17	+
chrX	107939969	107939970	COL4A5	27	+
chrX	107939675	107939676	COL4A5	10	+
chrX	107939606	107939607	COL4A5	9	+
chr9	34621046	34621047	ARID3C	4	-
chr13	111165371	111165372	COL4A2	3945	+
chr13	111165310	111165311	COL4A2	398	+
chr13	111165192	111165193	COL4A2	74	+
chr13	111164904	111164905	COL4A2	63	+
chr13	111164585	111164586	COL4A2	40	+
chr13	110801311	110801312	COL4A1	23	-
chr13	110801413	110801414	COL4A1	97	-
chr13	110801494	110801495	COL4A1	18	-
chr13	110802090	110802091	COL4A1	77	-
chr13	110802452	110802453	COL4A1	1462	-
chr13	110802504	110802505	COL4A1	120	-
chr13	110804722	110804723	COL4A1	24	-
chr14	45584786	45584787	FKBP3	128	-
chr14	45585106	45585107	FKBP3	526	-
chr14	45585250	45585251	FKBP3	213	-
chr14	45585333	45585334	FKBP3	35	-
chr14	45590688	45590689	FKBP3	32	-
chr17	42430470	42430471	GRN	5343	+
chr17	42430379	42430380	GRN	164	+
chr17	42430313	42430314	GRN	197	+
chr17	42430252	42430253	GRN	231	+
chr17	42429903	42429904	GRN	90	+
chr10	73773312	73773313	CHST3	274	+
chr10	73773164	73773165	CHST3	18	+
chr10	73768785	73768786	CHST3	11	+
chr3	142841798	142841799	CHST2	39	+
chr3	142841608	142841609	CHST2	18	+
chr3	142841335	142841336	CHST2	59	+
chr16	75560835	75560836	CHST5	6	-
chr16	75562430	75562431	CHST5	32	-
chr16	71572486	71572487	CHST4	17	+
chr16	71572413	71572414	CHST4	9	+
chrX	46457839	46457840	CHST7	5	+
chrX	46457615	46457616	CHST7	11	+
chr3	188656442	188656443	TPRG1-AS1	4	-
chr3	188657789	188657790	TPRG1-AS1	4	-
chr3	188659305	188659306	TPRG1-AS1	8	-
chr16	31394253	31394254	ITGAX	30	+
chr16	31394188	31394189	ITGAX	7	+
chr16	31393858	31393859	ITGAX	6	+
chr16	3541765	3541766	C16orf90	10	-
chr15	80253297	80253298	BCL2A1	9	-
chr8	124360262	124360263	MIR548D1	4	-
chr21	38124352	38124353	HLCS	14	-
chr21	38126068	38126069	HLCS	5	-
chr21	38126454	38126455	HLCS	17	-
chr17	54672971	54672972	NOG	1294	+
chr17	54672868	54672869	NOG	49	+
chr17	54672590	54672591	NOG	82	+
chr17	54672382	54672383	NOG	212	+
chr17	54671364	54671365	NOG	27	+
chr2	187545624	187545625	ITGAV	290	+
chr2	187542751	187542752	ITGAV	14	+
chr2	187542511	187542512	ITGAV	96	+
chr2	187542331	187542332	ITGAV	99	+
chr9	34629772	34629773	SIGMAR1	81	-
chr9	34634721	34634722	SIGMAR1	1508	-
chr9	34635007	34635008	SIGMAR1	45	-
chr9	34635163	34635164	SIGMAR1	26	-
chr3	9799032	9799033	CAMK1	730	-
chr16	31344583	31344584	ITGAM	2	+
chr16	31343703	31343704	ITGAM	8	+
chr17	53402425	53402426	HLF	7	+
chr17	53400343	53400344	HLF	10	+
chr17	53399468	53399469	HLF	12	+
chr17	53398365	53398366	HLF	4	+
chr8	120436595	120436596	NOV	135	+
chr8	120436475	120436476	NOV	10	+
chr8	120435655	120435656	NOV	21	+
chr8	120435382	120435383	NOV	6	+
chr17	65464536	65464537	MIR548D2	5	-
chr17	65464831	65464832	MIR548D2	9	-
chr17	65467041	65467042	MIR548D2	4	-
chr16	31439965	31439966	ITGAD	6	+
chr16	31438442	31438443	ITGAD	32	+
chr19	53089604	53089605	ZNF701	3	+
chr19	53088806	53088807	ZNF701	9	+
chr19	53087818	53087819	ZNF701	7	+
chr2	220048445	220048446	FAM134A	494	+
chr2	220048212	220048213	FAM134A	1039	+
chr2	220047905	220047906	FAM134A	19	+
chr11	74210119	74210120	LOC100287896	5	+
chr11	74209286	74209287	LOC100287896	32	+
chr11	74209144	74209145	LOC100287896	8	+
chr13	37416715	37416716	SMAD9	13	-
chr13	37417528	37417529	SMAD9	119	-
chr13	37418971	37418972	SMAD9	9	-
chr13	37420840	37420841	SMAD9	8	-
chr13	37421749	37421750	SMAD9	11	-
chr13	37422504	37422505	SMAD9	18	-
chr13	37422708	37422709	SMAD9	23	-
chr6	42195865	42195866	TRERF1	57	-
chr17	43245012	43245013	LOC105371795	4	-
chr17	43245278	43245279	LOC105371795	14	-
chr17	43246169	43246170	LOC105371795	5	-
chr18	48611409	48611410	SMAD4	31	+
chr18	48606146	48606147	SMAD4	132	+
chr18	48605798	48605799	SMAD4	12	+
chr18	48604909	48604910	SMAD4	65	+
chr5	135519184	135519185	SMAD5	19	+
chr5	135518421	135518422	SMAD5	54	+
chr5	135514740	135514741	SMAD5	25	+
chr5	135513321	135513322	SMAD5	26	+
chr5	135513190	135513191	SMAD5	7	+
chr5	135489592	135489593	SMAD5	5	+
chr15	67074325	67074326	SMAD6	5	+
chr15	67074135	67074136	SMAD6	9	+
chr15	67074046	67074047	SMAD6	8	+
chr15	67073972	67073973	SMAD6	5	+
chr15	67073457	67073458	SMAD6	5	+
chr18	46446231	46446232	SMAD7	24	-
chr18	46446320	46446321	SMAD7	15	-
chr18	46447355	46447356	SMAD7	20	-
chr1	150615203	150615204	GOLPH3L	9	-
chr1	150617016	150617017	GOLPH3L	25	-
chr1	150618708	150618709	GOLPH3L	89	-
chr1	150619543	150619544	GOLPH3L	33	-
chr1	150620427	150620428	GOLPH3L	57	-
chr1	150620553	150620554	GOLPH3L	39	-
chr1	150620741	150620742	GOLPH3L	71	-
chr1	150620885	150620886	GOLPH3L	10	-
chr4	146480314	146480315	SMAD1	119	+
chr4	146479231	146479232	SMAD1	178	+
chr2	64820136	64820137	AFTPH	65	+
chr2	64819249	64819250	AFTPH	1192	+
chr2	64819171	64819172	AFTPH	39	+
chr15	67488500	67488501	SMAD3	29	+
chr15	67487503	67487504	SMAD3	518	+
chr15	67483849	67483850	SMAD3	617	+
chr11	65635121	65635122	MUS81	8	+
chr11	65633924	65633925	MUS81	279	+
chr11	65633852	65633853	MUS81	38	+
chr11	65633637	65633638	MUS81	17	+
chr17	79160828	79160829	AATK-AS1	3	+
chr17	79160774	79160775	AATK-AS1	3	+
chr2	128619209	128619210	AMMECR1L	54	-
chr2	128619670	128619671	AMMECR1L	27	-
chr2	128620621	128620622	AMMECR1L	17	-
chr2	128620791	128620792	AMMECR1L	208	-
chr12	8254281	8254282	NECAP1	8	+
chr12	8252472	8252473	NECAP1	16	+
chr12	8251189	8251190	NECAP1	6	+
chr12	8250365	8250366	NECAP1	143	+
chr12	8250290	8250291	NECAP1	9	+
chr12	8250030	8250031	NECAP1	7	+
chr12	8249036	8249037	NECAP1	9	+
chr4	69093144	69093145	TMPRSS11B	6	-
chr6	160532532	160532533	IGF2R	17	+
chr6	160532466	160532467	IGF2R	22	+
chr6	160532125	160532126	IGF2R	33	+
chr6	160530142	160530143	IGF2R	27	+
chr6	160527914	160527915	IGF2R	23	+
chr6	160527581	160527582	IGF2R	178	+
chr6	160527427	160527428	IGF2R	16	+
chr6	160527087	160527088	IGF2R	16	+
chr6	160527027	160527028	IGF2R	13	+
chr6	160526679	160526680	IGF2R	39	+
chr6	160526538	160526539	IGF2R	67	+
chr6	160526476	160526477	IGF2R	14	+
chr6	160526228	160526229	IGF2R	14	+
chr6	160465658	160465659	IGF2R	10	+
chr6	160390425	160390426	IGF2R	12	+
chr4	68914482	68914483	TMPRSS11F	26	-
chr20	36242997	36242998	LINC00489	7	-
chr19	53429738	53429739	ZNF321P	9	-
chr19	53430388	53430389	ZNF321P	9	-
chr19	53432158	53432159	ZNF321P	22	-
chr19	53432382	53432383	ZNF321P	11	-
chr3	52002532	52002533	ABHD14B	2011	-
chr20	1237620	1237621	RAD21L1	3	+
chr5	156820215	156820216	CYFIP2	4419	+
chr1	154951719	154951720	CKS1B	931	+
chr1	154951655	154951656	CKS1B	67	+
chr1	154951391	154951392	CKS1B	235	+
chr5	150871932	150871933	SLC36A1	66	+
chr5	150871718	150871719	SLC36A1	44	+
chr5	150868614	150868615	SLC36A1	7	+
chr5	150868278	150868279	SLC36A1	9	+
chr5	150850519	150850520	SLC36A1	18	+
chr5	150846865	150846866	SLC36A1	9	+
chrX	151876750	151876751	CSAG3	1121	-
chr1	40260297	40260298	LOC101929536	5	+
chr1	40260049	40260050	LOC101929536	11	+
chr3	150419892	150419893	ERICH6	3	-
chr3	150421271	150421272	ERICH6	3	-
chr19	41953745	41953746	ERICH4	13	+
chr19	41952178	41952179	ERICH4	5	+
chr2	171658489	171658490	ERICH2	4	+
chr2	171655475	171655476	ERICH2	17	+
chr2	171655392	171655393	ERICH2	5	+
chr2	171634617	171634618	ERICH2	22	+
chr8	564749	564750	ERICH1	8	-
chr8	614201	614202	ERICH1	12	-
chr8	623878	623879	ERICH1	8	-
chr8	623992	623993	ERICH1	12	-
chr1	44407232	44407233	ARTN	6	+
chr1	44402911	44402912	ARTN	9	+
chr15	20612260	20612261	HERC2P3	9	-
chr15	20636348	20636349	HERC2P3	9	-
chr15	20641134	20641135	HERC2P3	9	-
chr15	20642570	20642571	HERC2P3	22	-
chr15	20644205	20644206	HERC2P3	8	-
chr15	20645844	20645845	HERC2P3	8	-
chr15	20649568	20649569	HERC2P3	13	-
chr15	20651162	20651163	HERC2P3	11	-
chr19	617226	617227	POLRMT	785	-
chr11	3659350	3659351	ART5	23	-
chr11	3659743	3659744	ART5	24	-
chr16	32181606	32181607	HERC2P4	8	-
chr16	32191991	32191992	HERC2P4	6	-
chr16	32193570	32193571	HERC2P4	6	-
chr15	23393941	23393942	HERC2P7	148	+
chr15	23392675	23392676	HERC2P7	33	+
chr15	28935446	28935447	HERC2P9	28	+
chr15	28931148	28931149	HERC2P9	17	+
chr15	28930407	28930408	HERC2P9	120	+
chr15	28930339	28930340	HERC2P9	163	+
chr15	28930222	28930223	HERC2P9	28	+
chr15	28929996	28929997	HERC2P9	51	+
chr15	28929829	28929830	HERC2P9	21	+
chr15	28902437	28902438	HERC2P9	30	+
chrX	152713128	152713129	HAUS7	641	-
chr9	94793430	94793431	SPTLC1	96	-
chr9	94793631	94793632	SPTLC1	16	-
chr9	94794247	94794248	SPTLC1	117	-
chr9	94841345	94841346	SPTLC1	109	-
chr9	94841737	94841738	SPTLC1	12	-
chr20	62703699	62703700	TCEA2	250	+
chr1	23707868	23707869	TCEA3	14	-
chr8	54876847	54876848	TCEA1	14	-
chr8	54879117	54879118	TCEA1	359	-
chr8	54879183	54879184	TCEA1	190	-
chr8	54879332	54879333	TCEA1	62	-
chr8	54879682	54879683	TCEA1	12	-
chr8	54880005	54880006	TCEA1	37	-
chr8	54906232	54906233	TCEA1	9	-
chr8	54934638	54934639	TCEA1	12	-
chr20	30237447	30237448	COX4I2	3	+
chr16	85840605	85840606	COX4I1	17467	+
chr16	85840466	85840467	COX4I1	177	+
chr16	85840396	85840397	COX4I1	127	+
chr16	85838700	85838701	COX4I1	102	+
chr16	14763085	14763086	BFAR	94	+
chr16	14762863	14762864	BFAR	19	+
chr16	14762746	14762747	BFAR	68	+
chr16	14762692	14762693	BFAR	188	+
chr16	14762195	14762196	BFAR	42	+
chr16	14761808	14761809	BFAR	51	+
chr17_gl000205_random	124471	124472	MGC70870	7	+
chr17_gl000205_random	119085	119086	MGC70870	16	+
chr3	48673897	48673898	CELSR3	199	-
chr3	48674290	48674291	CELSR3	12	-
chr3	48675389	48675390	CELSR3	31	-
chr11	122747066	122747067	CRTAM	3	+
chr11	122742842	122742843	CRTAM	10	+
chrX	69259605	69259606	EDA	38	+
chrX	69259311	69259312	EDA	24	+
chrX	69080889	69080890	EDA	31	+
chr6	58234842	58234843	GUSBP4	5	-
chr6	58238549	58238550	GUSBP4	15	-
chr6	58238930	58238931	GUSBP4	17	-
chr6	58246118	58246119	GUSBP4	9	-
chr6	58250819	58250820	GUSBP4	16	-
chr6	58256387	58256388	GUSBP4	13	-
chr22	21994706	21994707	CCDC116	4	+
chr22	21993541	21993542	CCDC116	16	+
chr22	21991615	21991616	CCDC116	21	+
chr22	29185282	29185283	CCDC117	158	+
chr22	29184297	29184298	CCDC117	30	+
chr22	29183733	29183734	CCDC117	16	+
chr22	29182680	29182681	CCDC117	16	+
chr22	29182556	29182557	CCDC117	103	+
chr22	29182349	29182350	CCDC117	69	+
chr22	29179631	29179632	CCDC117	30	+
chr19	48799722	48799723	CCDC114	56	-
chr1	40706592	40706593	RLF	24	+
chr1	40706353	40706354	RLF	114	+
chr1	40705214	40705215	RLF	15	+
chr5	114601655	114601656	CCDC112	12	-
chr13	113755703	113755704	MCF2L	17	+
chr13	113754630	113754631	MCF2L	6	+
chr13	113752862	113752863	MCF2L	12	+
chr13	113752754	113752755	MCF2L	9	+
chr13	113745477	113745478	MCF2L	24	+
chr4	186364516	186364517	CCDC110	11	-
chr4	186365119	186365120	CCDC110	26	-
chr14	74750536	74750537	ABCD4	27	-
chr14	74752685	74752686	ABCD4	77	-
chr14	74752739	74752740	ABCD4	22	-
chr14	74752840	74752841	ABCD4	23	-
chr19	18307611	18307612	RAB3A	10	-
chr15	52229985	52229986	LEO1	15	-
chr15	52230224	52230225	LEO1	102	-
chr15	52246687	52246688	LEO1	12	-
chr18	8832775	8832776	MTCL1	86	+
chr18	8832128	8832129	MTCL1	6	+
chr18	8831893	8831894	MTCL1	6	+
chr19	42468436	42468437	ATP1A3	8	-
chr19	42470736	42470737	ATP1A3	47	-
chr19	42470811	42470812	ATP1A3	5	-
chr19	42470975	42470976	ATP1A3	6	-
chr1	160117746	160117747	ATP1A2	4	+
chr1	160117014	160117015	ATP1A2	30	+
chr1	116947394	116947395	ATP1A1	3295	+
chr1	116947109	116947110	ATP1A1	160	+
chr1	116946568	116946569	ATP1A1	120	+
chr1	116943882	116943883	ATP1A1	51	+
chr5	21589479	21589480	GUSBP1	22	+
chr5	21586917	21586918	GUSBP1	8	+
chr5	21501932	21501933	GUSBP1	12	+
chr5	21497181	21497182	GUSBP1	33	+
chr5	21495283	21495284	GUSBP1	26	+
chr5	21491612	21491613	GUSBP1	28	+
chr5	21491545	21491546	GUSBP1	11	+
chr5	21491429	21491430	GUSBP1	39	+
chr5	21474560	21474561	GUSBP1	60	+
chr2	242914741	242914742	LOC102723927	3	+
chr16	4740971	4740972	MGRN1	302	+
chr16	4740760	4740761	MGRN1	28	+
chr16	4740563	4740564	MGRN1	29	+
chr16	4739379	4739380	MGRN1	17	+
chr16	4739072	4739073	MGRN1	88	+
chr16	4737405	4737406	MGRN1	7	+
chr3	33186522	33186523	CRTAP	133	+
chr3	33184999	33185000	CRTAP	58	+
chr3	33184653	33184654	CRTAP	4079	+
chr3	33184424	33184425	CRTAP	143	+
chr3	33184311	33184312	CRTAP	112	+
chr3	33184153	33184154	CRTAP	127	+
chr19	49133661	49133662	SPHK2	115	+
chr17	74383935	74383936	SPHK1	502	+
chr10	48161502	48161503	CTSLP2	4	+
chr10	48160204	48160205	CTSLP2	4	+
chr5	61925777	61925778	IPO11	5	+
chr5	61924408	61924409	IPO11	37	+
chr5	61923653	61923654	IPO11	15	+
chr5	61923535	61923536	IPO11	9	+
chr5	61923335	61923336	IPO11	11	+
chr5	61923252	61923253	IPO11	8	+
chr10	104183008	104183009	CUEDC2	2194	-
chr1	44433693	44433694	IPO13	393	+
chr1	44433424	44433425	IPO13	472	+
chr5	173387312	173387313	CPEB4	31	+
chr5	173386739	173386740	CPEB4	13	+
chr5	173383461	173383462	CPEB4	84	+
chr5	173383285	173383286	CPEB4	73	+
chr5	173315483	173315484	CPEB4	9	+
chr6	26835581	26835582	GUSBP2	6	-
chr6	26839265	26839266	GUSBP2	9	-
chr6	26846487	26846488	GUSBP2	8	-
chr6	26851148	26851149	GUSBP2	7	-
chr6	26853149	26853150	GUSBP2	23	-
chr6	26856818	26856819	GUSBP2	10	-
chr6	26856912	26856913	GUSBP2	10	-
chr6	26924171	26924172	GUSBP2	10	-
chr15	83210370	83210371	CPEB1	15	-
chr15	83210975	83210976	CPEB1	6	-
chr15	83211952	83211953	CPEB1	155	-
chr15	83213045	83213046	CPEB1	90	-
chr16	75691329	75691330	TERF2IP	626	+
chr16	75691172	75691173	TERF2IP	38	+
chr16	75690691	75690692	TERF2IP	29	+
chr16	75690532	75690533	TERF2IP	20	+
chr16	75690478	75690479	TERF2IP	30	+
chr16	75690213	75690214	TERF2IP	29	+
chr4	15071774	15071775	CPEB2	13	+
chr4	15068244	15068245	CPEB2	89	+
chr13	48656962	48656963	MED4-AS1	23	+
chrX	114429846	114429847	RBMXL3	8	+
chr2	45615820	45615821	SRBD1	32	-
chr2	45615915	45615916	SRBD1	74	-
chr2	45616241	45616242	SRBD1	12	-
chr16	8881498	8881499	ABAT	12	+
chr16	8878424	8878425	ABAT	66	+
chr16	8878316	8878317	ABAT	9	+
chr16	8875386	8875387	ABAT	103	+
chr19	21984048	21984049	ZNF43	6	-
chr19	21984462	21984463	ZNF43	5	-
chr19	21988055	21988056	ZNF43	4	-
chr19	21989147	21989148	ZNF43	3	-
chr19	40531104	40531105	ZNF780B	4	-
chr19	40532707	40532708	ZNF780B	6	-
chr19	40538982	40538983	ZNF780B	9	-
chr19	40539092	40539093	ZNF780B	10	-
chr19	40542253	40542254	ZNF780B	4	-
chr19	40542442	40542443	ZNF780B	13	-
chr1	62543971	62543972	MIR3116-2	8	-
chr19	49133621	49133622	DBP	77	-
chr19	49133820	49133821	DBP	357	-
chr19	49133947	49133948	DBP	296	-
chr4	190884354	190884355	FRG1	333	+
chr4	190881964	190881965	FRG1	147	+
chr4	190878649	190878650	FRG1	32	+
chr4	190876300	190876301	FRG1	37	+
chr4	190873442	190873443	FRG1	48	+
chr4	190864374	190864375	FRG1	304	+
chr4	190862226	190862227	FRG1	59	+
chr4	190941267	190941268	FRG2	14	-
chr4	190943216	190943217	FRG2	38	-
chr4	190943473	190943474	FRG2	19	-
chr4	190943676	190943677	FRG2	24	-
chr4	190945510	190945511	FRG2	19	-
chr12	49458468	49458469	RHEBL1	43	-
chr3	100940559	100940560	IMPG2	4	-
chr3	100945573	100945574	IMPG2	5	-
chr3	159970100	159970101	IFT80	19	-
chr3	159974796	159974797	IFT80	16	-
chr3	159975971	159975972	IFT80	125	-
chr3	159976078	159976079	IFT80	24	-
chr3	160117194	160117195	IFT80	5	-
chr5	89711121	89711122	LOC731157	10	+
chr5	89706485	89706486	LOC731157	11	+
chr6	166762425	166762426	LOC100289495	4	+
chr13	20680568	20680569	LINC01072	15	+
chr11	3696250	3696251	NUP98	30	-
chr11	3697110	3697111	NUP98	490	-
chr11	3697523	3697524	NUP98	8	-
chr11	3733066	3733067	NUP98	9	-
chr11	3733446	3733447	NUP98	38	-
chr13	21269785	21269786	IFT88	46	+
chr13	21265501	21265502	IFT88	29	+
chr13	21141978	21141979	IFT88	41	+
chr1	21069179	21069180	HP1BP3	217	-
chr1	21069627	21069628	HP1BP3	24	-
chr1	21069704	21069705	HP1BP3	27	-
chr1	21071134	21071135	HP1BP3	336	-
chr1	21071255	21071256	HP1BP3	32	-
chr1	21074096	21074097	HP1BP3	11	-
chr1	21103090	21103091	HP1BP3	26	-
chr8	128429439	128429440	POU5F1B	4	+
chr17	46009092	46009093	SP2	12	+
chr17	46006321	46006322	SP2	26	+
chr17	46006177	46006178	SP2	63	+
chr17	46005833	46005834	SP2	30	+
chr17	46005766	46005767	SP2	13	+
chr2	96909121	96909122	STARD7-AS1	4	+
chr2	96908356	96908357	STARD7-AS1	16	+
chr2	96906035	96906036	STARD7-AS1	8	+
chrX	15802029	15802030	INE2	12	-
chrX	15803980	15803981	INE2	2	-
chr11	58394118	58394119	CNTF	4	+
chr11	58392097	58392098	CNTF	6	+
chr10	13252313	13252314	MCM10	14	+
chr10	13251898	13251899	MCM10	49	+
chr10	13251841	13251842	MCM10	31	+
chr10	13251617	13251618	MCM10	96	+
chr10	13251506	13251507	MCM10	82	+
chr10	13251435	13251436	MCM10	50	+
chr10	13246353	13246354	MCM10	12	+
chr16	56878676	56878677	NUP93	1259	+
chr16	56878565	56878566	NUP93	27	+
chr11	65306031	65306032	LTBP3	158	-
chr11	65306290	65306291	LTBP3	870	-
chr11	65307732	65307733	LTBP3	17	-
chr9	38406526	38406527	IGFBPL1	173	-
chr9	38407267	38407268	IGFBPL1	49	-
chr9	38408990	38408991	IGFBPL1	51	-
chr9	38409086	38409087	IGFBPL1	41	-
chr10	104208619	104208620	C10orf95	25	-
chr10	104209594	104209595	C10orf95	5	-
chr1	63330837	63330838	ATG4C	3	+
chr1	63330040	63330041	ATG4C	62	+
chr1	63329803	63329804	ATG4C	12	+
chr2	242613269	242613270	ATG4B	51	+
chr2	242612043	242612044	ATG4B	756	+
chrX	107397407	107397408	ATG4A	82	+
chr2	39963447	39963448	THUMPD2	49	-
chr2	39963562	39963563	THUMPD2	23	-
chr20	44802379	44802380	CDH22	23	-
chr20	44802475	44802476	CDH22	3	-
chr20	44802904	44802905	CDH22	4	-
chr19	10664093	10664094	ATG4D	654	+
chr19	10663777	10663778	ATG4D	275	+
chr19	42588395	42588396	POU2F2	20	-
chr19	42588837	42588838	POU2F2	15	-
chr19	42588999	42589000	POU2F2	5	-
chr19	42591766	42591767	POU2F2	4	-
chr19	42592425	42592426	POU2F2	5	-
chr19	42592668	42592669	POU2F2	7	-
chr19	42595264	42595265	POU2F2	11	-
chr14	101460930	101460931	SNORD114-31	2	+
chr7	133948933	133948934	LRGUK	8	+
chr11	71595755	71595756	LOC100129216	4	+
chr11	118829923	118829924	UPK2	7	+
chr1	196716632	196716633	CFH	13	+
chr1	196670693	196670694	CFH	43	+
chr16	46965199	46965200	GPT2	147	+
chr16	46963343	46963344	GPT2	1028	+
chr16	46963208	46963209	GPT2	36	+
chr14	20945246	20945247	PNP	210	+
chr19	864801	864802	CFD	9	+
chr19	863608	863609	CFD	9	+
chr19	863451	863452	CFD	38	+
chr19	863308	863309	CFD	104	+
chr6	31919871	31919872	CFB	541	+
chr6	31919379	31919380	CFB	4	+
chr13	45966203	45966204	TPT1-AS1	26	+
chr13	45965872	45965873	TPT1-AS1	28	+
chr13	45965616	45965617	TPT1-AS1	50	+
chr7	129156324	129156325	SMKR1	6	+
chr7	129152419	129152420	SMKR1	3	+
chr12	69240784	69240785	CPM	14	-
chr12	69241252	69241253	CPM	11	-
chr12	69248223	69248224	CPM	14	-
chr12	69249537	69249538	CPM	10	-
chr16	3771102	3771103	CREBBP	12	-
chr16	3776671	3776672	CREBBP	15	-
chr16	3776824	3776825	CREBBP	383	-
chr16	3776970	3776971	CREBBP	24	-
chr16	3777549	3777550	CREBBP	74	-
chr16	3781407	3781408	CREBBP	14	-
chr16	3781877	3781878	CREBBP	17	-
chr14	39651454	39651455	PNN	13	+
chr14	39651314	39651315	PNN	152	+
chr14	39651215	39651216	PNN	323	+
chr14	39650862	39650863	PNN	537	+
chr14	39650291	39650292	PNN	26	+
chr14	39650006	39650007	PNN	32	+
chr14	39649815	39649816	PNN	45	+
chr5	172461892	172461893	ATP6V0E1	2580	+
chr5	172461748	172461749	ATP6V0E1	79	+
chr5	172461629	172461630	ATP6V0E1	71	+
chr7	149577778	149577779	ATP6V0E2	322	+
chr7	149577684	149577685	ATP6V0E2	11	+
chr7	149577505	149577506	ATP6V0E2	11	+
chrX	47483613	47483614	CFP	7	-
chr13	95592335	95592336	LOC101927284	4	+
chr15	22567074	22567075	REREP3	11	+
chr12	53697646	53697647	AAAS	12	-
chr12	53698671	53698672	AAAS	19	-
chr12	53701245	53701246	AAAS	633	-
chr19	35779243	35779244	HAMP	7	+
chr19	35776043	35776044	HAMP	4	+
chr15	74922900	74922901	EDC3	145	-
chr15	74924878	74924879	EDC3	189	-
chr3	113351659	113351660	SIDT1	8	+
chr11	117068157	117068158	SIDT2	184	+
chr6	41108567	41108568	ADCY10P1	54	+
chr6	41108405	41108406	ADCY10P1	3	+
chr14	91006933	91006934	TTC7B	41	-
chr14	91007381	91007382	TTC7B	7	-
chr14	61176262	61176263	SIX4	52	-
chr14	61178625	61178626	SIX4	11	-
chr14	61179743	61179744	SIX4	47	-
chr14	61180154	61180155	SIX4	9	-
chr19	46268044	46268045	SIX5	166	-
chr19	46268387	46268388	SIX5	14	-
chr19	46272221	46272222	SIX5	26	-
chrX	134995811	134995812	SAGE1	6	+
chrX	134995219	134995220	SAGE1	88	+
chr1	181035397	181035398	MR1	5	+
chr1	181033119	181033120	MR1	4	+
chr1	181031073	181031074	MR1	6	+
chr1	181027176	181027177	MR1	6	+
chr1	181026255	181026256	MR1	10	+
chr1	181025687	181025688	MR1	7	+
chr1	181024849	181024850	MR1	47	+
chr1	181024660	181024661	MR1	8	+
chr1	181024557	181024558	MR1	3	+
chr2	45232348	45232349	SIX2	15	-
chr2	45232733	45232734	SIX2	3	-
chr21	23490107	23490108	LINC00308	4	+
chr7	99723126	99723127	CNPY4	146	+
chr6	42911165	42911166	CNPY3	79	+
chr6	42907000	42907001	CNPY3	9361	+
chr6	42906950	42906951	CNPY3	486	+
chr6	42906866	42906867	CNPY3	120	+
chr6	42906740	42906741	CNPY3	80	+
chr6	42906673	42906674	CNPY3	68	+
chr6	42904095	42904096	CNPY3	63	+
chr12	56704217	56704218	CNPY2	424	-
chr12	56708288	56708289	CNPY2	293	-
chr12	56708529	56708530	CNPY2	108	-
chr7	155295651	155295652	CNPY1	15	-
chr7	119260622	119260623	LVCAT5	6	-
chr7	119390869	119390870	LVCAT5	5	-
chr7	119422310	119422311	LVCAT5	59	-
chr10	135038660	135038661	KNDC1	38	+
chr4	44023298	44023299	LVCAT1	77	+
chr4	44022327	44022328	LVCAT1	9	+
chr4	44022055	44022056	LVCAT1	66	+
chr4	44021984	44021985	LVCAT1	11	+
chr19	3579079	3579080	HMG20B	1696	+
chr19	3578999	3579000	HMG20B	90	+
chr19	3578906	3578907	HMG20B	42	+
chr19	3578797	3578798	HMG20B	34	+
chr19	3578676	3578677	HMG20B	36	+
chr12	104382766	104382767	GLT8D2	44	-
chr12	104383058	104383059	GLT8D2	95	-
chr15	67493369	67493370	AAGAB	16	-
chr15	67494011	67494012	AAGAB	752	-
chr15	67494141	67494142	AAGAB	24	-
chr4	37597768	37597769	C4orf19	9	+
chr4	37595131	37595132	C4orf19	25	+
chr4	37594739	37594740	C4orf19	19	+
chr4	37594252	37594253	C4orf19	14	+
chr4	37593976	37593977	C4orf19	32	+
chr4	37593830	37593831	C4orf19	20	+
chr4	37593434	37593435	C4orf19	67	+
chr4	37593107	37593108	C4orf19	17	+
chr20	50446432	50446433	LINC01429	5	-
chr20	50447966	50447967	LINC01429	31	-
chr20	50449602	50449603	LINC01429	4	-
chr12	100735489	100735490	SCYL2	18	+
chr12	100733912	100733913	SCYL2	91	+
chr12	100733858	100733859	SCYL2	112	+
chr12	100732454	100732455	SCYL2	12	+
chr4	100464157	100464158	C4orf17	9	+
chr4	100464001	100464002	C4orf17	5	+
chr3	184795306	184795307	C3orf70	6	-
chr3	184800589	184800590	C3orf70	15	-
chr3	184800674	184800675	C3orf70	3	-
chr3	138208316	138208317	CEP70	25	-
chr3	138213189	138213190	CEP70	70	-
chr3	138213858	138213859	CEP70	123	-
chr3	138215752	138215753	CEP70	11	-
chr3	138218727	138218728	CEP70	109	-
chr3	138255987	138255988	CEP70	46	-
chr3	157813748	157813749	SHOX2	12	-
chr3	157813904	157813905	SHOX2	6	-
chr3	157814305	157814306	SHOX2	4	-
chr3	157814867	157814868	SHOX2	84	-
chr3	157814989	157814990	SHOX2	7	-
chr3	157815421	157815422	SHOX2	16	-
chr19	36881689	36881690	ZFP82	9	-
chr19	36882863	36882864	ZFP82	17	-
chr12	133416938	133416939	CHFR	27	-
chr12	133417135	133417136	CHFR	11	-
chr12	133417588	133417589	CHFR	9	-
chr8	12029712	12029713	FAM90A2P	6	-
chr19	12933104	12933105	RTBDN	5	-
chr19	12936297	12936298	RTBDN	43	-
chr13	47431432	47431433	HTR2A-AS1	29	+
chr16	15688245	15688246	KIAA0430	98	-
chr16	15688506	15688507	KIAA0430	37	-
chr16	15690457	15690458	KIAA0430	28	-
chr16	15733030	15733031	KIAA0430	6	-
chr22	42484417	42484418	SMDT1	78	+
chr22	42480287	42480288	SMDT1	40	+
chr22	42479356	42479357	SMDT1	2639	+
chr22	42479267	42479268	SMDT1	56	+
chr15	59819530	59819531	FAM81A	8	+
chr15	59815749	59815750	FAM81A	20	+
chr15	59815191	59815192	FAM81A	5	+
chr15	59814983	59814984	FAM81A	14	+
chr15	59814735	59814736	FAM81A	6	+
chr15	59813920	59813921	FAM81A	10	+
chr15	59813784	59813785	FAM81A	37	+
chr10	92911911	92911912	NUDT9P1	3	-
chr1	110024750	110024751	SYPL2	58	+
chr19	56284788	56284789	RFPL4AL1	836	+
chr19	56284561	56284562	RFPL4AL1	15	+
chr11	63678167	63678168	RCOR2	4	-
chr11	63678704	63678705	RCOR2	17	-
chr1	151313117	151313118	RFX5	109	-
chr1	151313240	151313241	RFX5	21	-
chr1	151313528	151313529	RFX5	17	-
chr1	151314437	151314438	RFX5	805	-
chr1	151314722	151314723	RFX5	72	-
chr1	151315605	151315606	RFX5	69	-
chr21	27252865	27252866	APP	1018	-
chr21	27253119	27253120	APP	1902	-
chr21	27253288	27253289	APP	151	-
chr21	27253351	27253352	APP	149	-
chr21	27253493	27253494	APP	347	-
chr21	27253671	27253672	APP	196	-
chr21	27253793	27253794	APP	175	-
chr21	27253890	27253891	APP	178	-
chr21	27254010	27254011	APP	52	-
chr21	27423325	27423326	APP	62	-
chr15	56379482	56379483	RFX7	22	-
chr15	56382738	56382739	RFX7	66	-
chr15	56384598	56384599	RFX7	16	-
chr15	56384748	56384749	RFX7	69	-
chr15	56385185	56385186	RFX7	12	-
chr15	56385437	56385438	RFX7	45	-
chr15	56385506	56385507	RFX7	9	-
chr14	80330758	80330759	NRXN3	9	+
chr14	80329634	80329635	NRXN3	6	+
chr14	80329395	80329396	NRXN3	5	+
chr14	80328779	80328780	NRXN3	22	+
chr11	65128922	65128923	TIGD3	8	+
chr11	65126982	65126983	TIGD3	6	+
chr11	65125080	65125081	TIGD3	5	+
chr19	5988189	5988190	RFX2	12	-
chr19	5990889	5990890	RFX2	4	-
chr19	5993176	5993177	RFX2	25	-
chr19	5993539	5993540	RFX2	59	-
chr9	3224735	3224736	RFX3	18	-
chr9	3225014	3225015	RFX3	9	-
chr17	62223514	62223515	SNORD104	126	+
chr5	94786859	94786860	FAM81B	6	+
chr19	4090322	4090323	MAP2K2	3919	-
chr19	4090404	4090405	MAP2K2	102	-
chr5	112184244	112184245	APC	10	+
chr5	112181760	112181761	APC	7	+
chr5	112180832	112180833	APC	12	+
chr5	112180673	112180674	APC	69	+
chr5	112179129	112179130	APC	21	+
chr5	112170730	112170731	APC	7	+
chr11	62559652	62559653	TMEM179B	288	+
chr11	62557842	62557843	TMEM179B	226	+
chr11	62557712	62557713	TMEM179B	865	+
chr11	62557609	62557610	TMEM179B	28	+
chr4	146050311	146050312	ABCE1	31	+
chr4	146050112	146050113	ABCE1	21	+
chr4	146049201	146049202	ABCE1	210	+
chr4	146049040	146049041	ABCE1	25	+
chr4	146048776	146048777	ABCE1	79	+
chr4	146046241	146046242	ABCE1	13	+
chr16	21994953	21994954	UQCRC2	53	+
chr16	21994673	21994674	UQCRC2	919	+
chr16	21994561	21994562	UQCRC2	37	+
chr16	21976854	21976855	UQCRC2	24	+
chr1	36602182	36602183	TRAPPC3	840	-
chr1	36602642	36602643	TRAPPC3	626	-
chrX	128904696	128904697	XPNPEP2	12	+
chr22	41328815	41328816	XPNPEP3	78	+
chr22	41323878	41323879	XPNPEP3	13	+
chr22	41323506	41323507	XPNPEP3	61	+
chr22	41322734	41322735	XPNPEP3	8	+
chr22	41322558	41322559	XPNPEP3	212	+
chr22	41258765	41258766	XPNPEP3	58	+
chr22	41257831	41257832	XPNPEP3	205	+
chr22	41257695	41257696	XPNPEP3	29	+
chr17	74002078	74002079	TEN1-CDK3	75	+
chr17	73996665	73996666	TEN1-CDK3	735	+
chr17	73996405	73996406	TEN1-CDK3	10	+
chr3	44655968	44655969	ZNF197-AS1	9	-
chr14	73741328	73741329	PAPLN	119	+
chr14	73741131	73741132	PAPLN	8	+
chr14	73739719	73739720	PAPLN	27	+
chr14	73725767	73725768	PAPLN	7	+
chr2	85567629	85567630	RETSAT	18	-
chr2	85567760	85567761	RETSAT	11	-
chr2	85568034	85568035	RETSAT	134	-
chr2	85568199	85568200	RETSAT	42	-
chr2	85569222	85569223	RETSAT	271	-
chr2	85570126	85570127	RETSAT	84	-
chr2	85570247	85570248	RETSAT	199	-
chr19	2921780	2921781	ZNF57	12	+
chr19	2918467	2918468	ZNF57	48	+
chr11	110278336	110278337	LOC105369486	10	+
chr14	25281699	25281700	STXBP6	35	-
chr1	32526450	32526451	KHDRBS1	50	+
chr1	32509475	32509476	KHDRBS1	1570	+
chr1	32508449	32508450	KHDRBS1	555	+
chr1	32508389	32508390	KHDRBS1	102	+
chr1	32508246	32508247	KHDRBS1	78	+
chr1	46109359	46109360	RPS15AP10	17	-
chr1	46111455	46111456	RPS15AP10	27	-
chr1	46112247	46112248	RPS15AP10	17	-
chr8	136659850	136659851	KHDRBS3	142	+
chr8	136659441	136659442	KHDRBS3	479	+
chr7	30535633	30535634	GGCT	18	-
chr7	30536239	30536240	GGCT	498	-
chr7	30536410	30536411	GGCT	19	-
chr7	30536786	30536787	GGCT	15	-
chr8	86354094	86354095	CA3-AS1	3	-
chr8	86368729	86368730	CA3-AS1	9	-
chr8	86368867	86368868	CA3-AS1	3	-
chr5	180028523	180028524	FLT4	42	-
chr5	180028610	180028611	FLT4	8	-
chr5	180034756	180034757	FLT4	64	-
chr17	37237879	37237880	LOC100131347	22	+
chr17	37236529	37236530	LOC100131347	18	+
chr2	96914253	96914254	TMEM127	12	-
chr2	96916314	96916315	TMEM127	570	-
chr2	96916651	96916652	TMEM127	91	-
chr2	96917391	96917392	TMEM127	270	-
chr2	96918154	96918155	TMEM127	33	-
chr2	96918766	96918767	TMEM127	27	-
chr2	96919626	96919627	TMEM127	18	-
chr13	28573595	28573596	FLT3	3	-
chr12	123349879	123349880	VPS37B	315	-
chr12	123350182	123350183	VPS37B	16	-
chr12	123380513	123380514	VPS37B	10	-
chr3	12577048	12577049	MKRN2OS	3	-
chr3	12581302	12581303	MKRN2OS	10	-
chr17	73996665	73996666	TEN1	735	+
chr9	33183780	33183781	B4GALT1-AS1	6	+
chr2	234774092	234774093	MSL3P1	276	-
chr2	234774393	234774394	MSL3P1	12	-
chr10	134019261	134019262	DPYSL4	747	+
chr10	134019129	134019130	DPYSL4	31	+
chr10	134018985	134018986	DPYSL4	17	+
chr1	150480076	150480077	TARS2	244	+
chr1	150479747	150479748	TARS2	24	+
chr8	26515690	26515691	DPYSL2	321	+
chr8	26515610	26515611	DPYSL2	45	+
chr8	26515418	26515419	DPYSL2	409	+
chr8	26515091	26515092	DPYSL2	24	+
chr8	26514902	26514903	DPYSL2	19	+
chr8	26513609	26513610	DPYSL2	41	+
chr8	26513545	26513546	DPYSL2	30	+
chr8	26513306	26513307	DPYSL2	21	+
chr8	26481793	26481794	DPYSL2	26	+
chr5	146770376	146770377	DPYSL3	184	-
chr5	146772937	146772938	DPYSL3	948	-
chr5	146773317	146773318	DPYSL3	170	-
chr5	146773406	146773407	DPYSL3	85	-
chr3	196671813	196671814	NCBP2-AS2	35	+
chr3	196670884	196670885	NCBP2-AS2	32	+
chr3	196670413	196670414	NCBP2-AS2	437	+
chr3	196670318	196670319	NCBP2-AS2	94	+
chr6	30685914	30685915	MDC1-AS1	6	+
chr21	46119111	46119112	KRTAP10-12	3	+
chr21	46062758	46062759	KRTAP10-10	15	+
chr21	46062604	46062605	KRTAP10-10	2	+
chr2	217532295	217532296	IGFBP2	6	+
chr15	50995578	50995579	SPPL2A	10	-
chr15	50999334	50999335	SPPL2A	38	-
chr15	50999775	50999776	SPPL2A	787	-
chr15	50999921	50999922	SPPL2A	21	-
chr8	90729628	90729629	LOC101929709	17	-
chr16	27794802	27794803	GSG1L	3	-
chr16	27797077	27797078	GSG1L	19	-
chr16	27802216	27802217	GSG1L	32	-
chr12	53496124	53496125	IGFBP6	451	+
chr4	57896942	57896943	IGFBP7	39	-
chr4	57897246	57897247	IGFBP7	1767	-
chr4	57897371	57897372	IGFBP7	434	-
chr4	57898592	57898593	IGFBP7	116	-
chr4	57899361	57899362	IGFBP7	84	-
chr4	57906990	57906991	IGFBP7	99	-
chr4	57976344	57976345	IGFBP7	42	-
chr2	217536829	217536830	IGFBP5	251	-
chr2	217536941	217536942	IGFBP5	83	-
chr2	217537060	217537061	IGFBP5	536	-
chr2	217537184	217537185	IGFBP5	85	-
chr2	217537284	217537285	IGFBP5	73	-
chr2	217537612	217537613	IGFBP5	250	-
chr2	217538427	217538428	IGFBP5	15	-
chr2	217539658	217539659	IGFBP5	53	-
chr2	217540274	217540275	IGFBP5	46	-
chr2	217540743	217540744	IGFBP5	80	-
chr2	217540958	217540959	IGFBP5	46	-
chr2	217541342	217541343	IGFBP5	131	-
chr2	217559169	217559170	IGFBP5	44	-
chr2	217559398	217559399	IGFBP5	22	-
chr2	217559453	217559454	IGFBP5	26	-
chr2	217559596	217559597	IGFBP5	94	-
chr9	42841195	42841196	LOC286297	15	-
chr9	42845359	42845360	LOC286297	260	-
chr9	42845816	42845817	LOC286297	17	-
chr9	42845914	42845915	LOC286297	11	-
chr9	67018364	67018365	LOC286297	265	-
chr9	67018416	67018417	LOC286297	39	-
chr9	67018816	67018817	LOC286297	16	-
chr9	67018912	67018913	LOC286297	13	-
chr14	65412535	65412536	RAB15	519	-
chr14	65412593	65412594	RAB15	123	-
chr14	65414625	65414626	RAB15	33	-
chr11	14899559	14899560	CYP2R1	98	-
chr16	66599970	66599971	CKLF	474	+
chr16	66599894	66599895	CKLF	107	+
chr16	66592248	66592249	CKLF	62	+
chr17	7485292	7485293	LOC100996842	37	-
chr6	43964267	43964268	LOC101929705	67	-
chr7	76686685	76686686	PMS2P9	17	+
chr7	76685878	76685879	PMS2P9	13	+
chr7	76685726	76685727	PMS2P9	19	+
chr7	76685580	76685581	PMS2P9	12	+
chr7	76684492	76684493	PMS2P9	12	+
chr7	76683332	76683333	PMS2P9	84	+
chr7	76681173	76681174	PMS2P9	76	+
chr7	76676262	76676263	PMS2P9	66	+
chr15	80217192	80217193	ST20-AS1	57	+
chr1	35261346	35261347	GJA4	4	+
chr1	25226059	25226060	RUNX3	8	-
chr1	25227535	25227536	RUNX3	21	-
chr7	99913237	99913238	PMS2P1	11	-
chr7	99913615	99913616	PMS2P1	12	-
chr7	99916364	99916365	PMS2P1	22	-
chr7	99916537	99916538	PMS2P1	34	-
chr7	99918537	99918538	PMS2P1	131	-
chr7	99923286	99923287	PMS2P1	116	-
chr7	99923336	99923337	PMS2P1	15	-
chr7	72496374	72496375	PMS2P2	9	+
chr7	72495927	72495928	PMS2P2	17	+
chr7	72493861	72493862	PMS2P2	35	+
chr7	72493704	72493705	PMS2P2	21	+
chr7	72491706	72491707	PMS2P2	152	+
chr7	75132180	75132181	PMS2P3	68	-
chr7	75134617	75134618	PMS2P3	13	-
chr7	75134808	75134809	PMS2P3	56	-
chr7	75135098	75135099	PMS2P3	12	-
chr7	75135349	75135350	PMS2P3	27	-
chr7	75136098	75136099	PMS2P3	22	-
chr7	75136388	75136389	PMS2P3	25	-
chr7	75137075	75137076	PMS2P3	471	-
chr7	66738461	66738462	PMS2P4	57	-
chr7	66738587	66738588	PMS2P4	102	-
chr7	66740031	66740032	PMS2P4	48	-
chr7	66752528	66752529	PMS2P4	68	-
chr7	66757422	66757423	PMS2P4	412	-
chr7	74321853	74321854	PMS2P5	122	+
chr7	74317120	74317121	PMS2P5	48	+
chr7	72519768	72519769	PMS2P5	133	+
chr7	72515036	72515037	PMS2P5	65	+
chr7	72511863	72511864	PMS2P5	13	+
chr7	72490366	72490367	PMS2P7	8	+
chr7	72489104	72489105	PMS2P7	27	+
chr7	72488709	72488710	PMS2P7	9	+
chr7	72487955	72487956	PMS2P7	26	+
chr7	72486974	72486975	PMS2P7	69	+
chr18	47014886	47014887	SNORD58C	16075	-
chr18	47015287	47015288	SNORD58C	18	-
chr12	10758612	10758613	MAGOHB	284	-
chr12	10758869	10758870	MAGOHB	360	-
chr12	10763221	10763222	MAGOHB	22	-
chr5	140949327	140949328	LOC100505658	3	+
chr5	140946461	140946462	LOC100505658	6	+
chr5	140946238	140946239	LOC100505658	3	+
chr5	137772714	137772715	KDM3B	9	+
chr5	137772503	137772504	KDM3B	7	+
chr5	137765654	137765655	KDM3B	6	+
chr7	64434948	64434949	ZNF117	6	-
chr7	64437110	64437111	ZNF117	20	-
chr7	64437176	64437177	ZNF117	3	-
chr7	64450739	64450740	ZNF117	6	-
chr19	48795678	48795679	ZNF114	14	+
chr19	48792114	48792115	ZNF114	4	+
chr19	48790983	48790984	ZNF114	18	+
chr19	48790863	48790864	ZNF114	50	+
chr19	48790753	48790754	ZNF114	31	+
chr19	48790467	48790468	ZNF114	31	+
chr2	86719838	86719839	KDM3A	164	+
chr2	86719424	86719425	KDM3A	7	+
chr2	86719226	86719227	KDM3A	7	+
chr19	44830710	44830711	ZNF112	6	-
chr11	68382799	68382800	PPP6R3	70	+
chr11	68382060	68382061	PPP6R3	102	+
chr11	68381242	68381243	PPP6R3	22	+
chr11	68381141	68381142	PPP6R3	14	+
chr11	68380938	68380939	PPP6R3	14	+
chr11	68380784	68380785	PPP6R3	48	+
chr19	54663847	54663848	TMC4	10	-
chr14	24778330	24778331	NOP9	27	+
chr14	24777378	24777379	NOP9	138	+
chr14	24774417	24774418	NOP9	40	+
chr15	55706114	55706115	DYX1C1	21	-
chr15	55789997	55789998	DYX1C1	3	-
chr16	19074164	19074165	TMC7	8	+
chr16	19073936	19073937	TMC7	4	+
chr16	19073286	19073287	TMC7	40	+
chr16	19071298	19071299	TMC7	5	+
chr11	34903915	34903916	APIP	21	-
chr11	34904128	34904129	APIP	5	-
chr15	81623430	81623431	TMC3	5	-
chr6	110421022	110421023	WASF1	52	-
chr6	110421689	110421690	WASF1	29	-
chr2	27583320	27583321	EIF2B4	16	-
chr2	27584365	27584366	EIF2B4	36	-
chr2	27586681	27586682	EIF2B4	16	-
chr2	27587224	27587225	EIF2B4	509	-
chr3	183868054	183868055	EIF2B5	222	+
chr3	183867874	183867875	EIF2B5	143	+
chr3	183867824	183867825	EIF2B5	123	+
chr3	183867766	183867767	EIF2B5	106	+
chr3	183867657	183867658	EIF2B5	8	+
chr3	183863098	183863099	EIF2B5	581	+
chr14	75476292	75476293	EIF2B2	598	+
chr14	75476093	75476094	EIF2B2	30	+
chr3	111371086	111371087	CD96	3	+
chr3	111370730	111370731	CD96	4	+
chr3	111370573	111370574	CD96	4	+
chr3	111325712	111325713	CD96	5	+
chr12	124105575	124105576	EIF2B1	414	-
chr12	124105765	124105766	EIF2B1	31	-
chr12	124105888	124105889	EIF2B1	16	-
chr3	48784020	48784021	PRKAR2A	117	-
chr3	48784501	48784502	PRKAR2A	308	-
chr3	48784730	48784731	PRKAR2A	44	-
chr3	48785579	48785580	PRKAR2A	92	-
chr3	48785744	48785745	PRKAR2A	549	-
chr3	48786933	48786934	PRKAR2A	151	-
chr3	48787344	48787345	PRKAR2A	102	-
chr3	48788680	48788681	PRKAR2A	171	-
chr7	106801944	106801945	PRKAR2B	29	+
chr7	106801866	106801867	PRKAR2B	18	+
chr7	106800354	106800355	PRKAR2B	15	+
chr7	106800187	106800188	PRKAR2B	63	+
chr7	106791396	106791397	PRKAR2B	8	+
chr11	74551853	74551854	XRRA1	13	-
chr11	74554015	74554016	XRRA1	258	-
chr11	74659973	74659974	XRRA1	44	-
chrX	77079322	77079323	MAGT1	15	-
chrX	77081864	77081865	MAGT1	171	-
chrX	77082958	77082959	MAGT1	102	-
chrX	77084087	77084088	MAGT1	395	-
chrX	77084389	77084390	MAGT1	56	-
chrX	77084497	77084498	MAGT1	124	-
chrX	77084577	77084578	MAGT1	155	-
chr1	145444866	145444867	TXNIP	9	+
chr1	145442626	145442627	TXNIP	227	+
chr1	145442562	145442563	TXNIP	30	+
chr1	145442221	145442222	TXNIP	10	+
chr1	145441737	145441738	TXNIP	37	+
chr11	92880446	92880447	SLC36A4	14	-
chr11	92880852	92880853	SLC36A4	133	-
chr11	92881450	92881451	SLC36A4	11	-
chr11	92881619	92881620	SLC36A4	35	-
chr11	92881687	92881688	SLC36A4	28	-
chr11	92881859	92881860	SLC36A4	24	-
chr1	29444637	29444638	TMEM200B	6	-
chr3	158323184	158323185	MLF1	284	+
chr3	158323006	158323007	MLF1	149	+
chr16	29713560	29713561	QPRT	23	+
chr16	29710018	29710019	QPRT	254	+
chr16	29708958	29708959	QPRT	2306	+
chr16	1560429	1560430	IFT140	1234	-
chr12	6857170	6857171	MLF2	11020	-
chr12	6857282	6857283	MLF2	286	-
chr6	10734766	10734767	TMEM14C	23	+
chr6	10731358	10731359	TMEM14C	1253	+
chr6	10731123	10731124	TMEM14C	59	+
chr6	10731011	10731012	TMEM14C	28	+
chr6	10760531	10760532	TMEM14B	17	+
chr6	10757210	10757211	TMEM14B	1315	+
chr6	10756863	10756864	TMEM14B	32	+
chr9	141138873	141138874	FAM157B	7	+
chr9	141138059	141138060	FAM157B	12	+
chr9	141135366	141135367	FAM157B	5	+
chr16	90245193	90245194	FAM157C	7	+
chr16	90244736	90244737	FAM157C	7	+
chr16	90244402	90244403	FAM157C	11	+
chr16	90243944	90243945	FAM157C	12	+
chr3	168797942	168797943	MECOM	7	-
chr3	168801296	168801297	MECOM	45	-
chr3	168801590	168801591	MECOM	14	-
chr3	168801982	168801983	MECOM	34	-
chr3	168802543	168802544	MECOM	32	-
chr6	159393502	159393503	RSPH3	8	-
chr6	159393907	159393908	RSPH3	34	-
chr6	159394880	159394881	RSPH3	60	-
chr6	159397658	159397659	RSPH3	9	-
chr6	159397855	159397856	RSPH3	21	-
chr6	159398403	159398404	RSPH3	137	-
chr6	159420416	159420417	RSPH3	16	-
chr2	201660974	201660975	AOX3P-AOX2P	13	+
chr6	35434877	35434878	FANCE	172	+
chr18	32953259	32953260	ZNF396	4	-
chr1	46686927	46686928	LURAP1	6	+
chr1	46686863	46686864	LURAP1	6	+
chr1	46686002	46686003	LURAP1	32	+
chr1	46685912	46685913	LURAP1	28	+
chr11	74954739	74954740	TPBGL	55	+
chr9	96098184	96098185	C9orf129	5	-
chr2	215792417	215792418	ABCA12	2	-
chr21	36091030	36091031	CLIC6	3	+
chr21	36090928	36090929	CLIC6	3	+
chr1	196762870	196762871	CFHR3	7	+
chr1	25170758	25170759	CLIC4	226	+
chr1	25168804	25168805	CLIC4	26	+
chr1	25168515	25168516	CLIC4	14	+
chr1	25168280	25168281	CLIC4	95	+
chr1	25167440	25167441	CLIC4	1130	+
chr1	196801317	196801318	CFHR1	4	+
chr1	196799777	196799778	CFHR1	4	+
chr6	13290715	13290716	PHACTR1	14	+
chr6	13288069	13288070	PHACTR1	15	+
chrX	70390154	70390155	NLGN3	2	+
chr1	196888315	196888316	CFHR4	4	+
chr6	144151965	144151966	PHACTR2	65	+
chr6	144150768	144150769	PHACTR2	15	+
chr6	144149117	144149118	PHACTR2	8	+
chr6	144147192	144147193	PHACTR2	9	+
chr6	144147001	144147002	PHACTR2	7	+
chr6	144146301	144146302	PHACTR2	60	+
chr6	144146236	144146237	PHACTR2	7	+
chr6	144145709	144145710	PHACTR2	15	+
chr6	144145461	144145462	PHACTR2	11	+
chr6	144145282	144145283	PHACTR2	46	+
chr6	144145186	144145187	PHACTR2	18	+
chr17	39214259	39214260	KRTAP2-3	19	-
chr17	39215499	39215500	KRTAP2-3	102	-
chr17	39215635	39215636	KRTAP2-3	32	-
chr17	39215783	39215784	KRTAP2-3	24	-
chr17	39211002	39211003	KRTAP2-2	3	-
chr17	39211242	39211243	KRTAP2-2	9	-
chr9	89698809	89698810	LOC494127	3	-
chr9	89699173	89699174	LOC494127	4	-
chr9	89699331	89699332	LOC494127	3	-
chr17	39221799	39221800	KRTAP2-4	6	-
chr17	39221900	39221901	KRTAP2-4	5	-
chr17	39221971	39221972	KRTAP2-4	5	-
chr19	36038428	36038429	TMEM147	4752	+
chr19	36038310	36038311	TMEM147	175	+
chr19	36038142	36038143	TMEM147	122	+
chr19	36037931	36037932	TMEM147	85	+
chr8	110356677	110356678	ENY2	62	+
chr8	110355812	110355813	ENY2	634	+
chr8	110355719	110355720	ENY2	74	+
chr8	110352764	110352765	ENY2	20	+
chr8	110351619	110351620	ENY2	30	+
chr8	110348433	110348434	ENY2	21	+
chr19	42829214	42829215	TMEM145	27	+
chr4	159176354	159176355	TMEM144	10	+
chr4	159174885	159174886	TMEM144	25	+
chr19	48835618	48835619	TMEM143	81	-
chr19	48835677	48835678	TMEM143	23	-
chr19	48836320	48836321	TMEM143	4	-
chr1	155864693	155864694	RIT1	10	-
chr1	155865563	155865564	RIT1	8	-
chr1	155869947	155869948	RIT1	161	-
chr1	155870285	155870286	RIT1	5	-
chr9	139687708	139687709	TMEM141	352	+
chr7	134853843	134853844	TMEM140	23	+
chr7	134850581	134850582	TMEM140	295	+
chr11	64532084	64532085	SF1	1135	-
chr11	64532153	64532154	SF1	81	-
chr11	64532325	64532326	SF1	77	-
chr11	64533256	64533257	SF1	91	-
chr1	220226278	220226279	BPNT1	12	-
chr1	220230461	220230462	BPNT1	18	-
chr1	220231071	220231072	BPNT1	47	-
chr1	220231177	220231178	BPNT1	14	-
chr1	220231889	220231890	BPNT1	75	-
chr1	220232188	220232189	BPNT1	18	-
chr14	65512226	65512227	MIR4706	4	+
chr12	56078356	56078357	ITGA7	375	-
chr12	56078717	56078718	ITGA7	10	-
chr11	43366073	43366074	API5	178	+
chr11	43364984	43364985	API5	37	+
chr11	43364423	43364424	API5	29	+
chr11	43364261	43364262	API5	48	+
chr11	43357537	43357538	API5	30	+
chr19	41171084	41171085	NUMBL	8	-
chr19	41171822	41171823	NUMBL	12	-
chr19	41172071	41172072	NUMBL	25	-
chr19	41172591	41172592	NUMBL	59	-
chr19	41172762	41172763	NUMBL	13	-
chr19	41172851	41172852	NUMBL	15	-
chr19	41173077	41173078	NUMBL	11	-
chr11	66627945	66627946	LRFN4	278	+
chr19	19101703	19101704	SUGP2	889	-
chr19	19101799	19101800	SUGP2	56	-
chr19	19102879	19102880	SUGP2	20	-
chr19	19103176	19103177	SUGP2	55	-
chr19	19103895	19103896	SUGP2	33	-
chr19	19104145	19104146	SUGP2	24	-
chr19	19104350	19104351	SUGP2	93	-
chrX	142968332	142968333	UBE2NL	4	+
chrX	142967865	142967866	UBE2NL	3	+
chrX	142967635	142967636	UBE2NL	9	+
chrX	142967433	142967434	UBE2NL	7	+
chr8	67328716	67328717	RRS1-AS1	5	-
chr6	32814271	32814272	PSMB8-AS1	19	+
chr6	32813837	32813838	PSMB8-AS1	16	+
chr15	49280838	49280839	SECISBP2L	20	-
chr15	49280985	49280986	SECISBP2L	14	-
chr15	49283593	49283594	SECISBP2L	7	-
chr15	49284148	49284149	SECISBP2L	23	-
chr15	49284324	49284325	SECISBP2L	122	-
chr2	110376565	110376566	SOWAHC	91	+
chr2	110375592	110375593	SOWAHC	138	+
chr2	110374453	110374454	SOWAHC	13	+
chr2	110374222	110374223	SOWAHC	29	+
chr2	110373712	110373713	SOWAHC	45	+
chrX	118899087	118899088	SOWAHD	12	+
chr8	122621387	122621388	HAS2	8	-
chr8	122624357	122624358	HAS2	8	-
chr8	122625638	122625639	HAS2	12	-
chr8	122625748	122625749	HAS2	16	-
chr6	33032794	33032795	HLA-DPA1	272	-
chr16	16444443	16444444	PKD1P1	928	+
chr16	16444340	16444341	PKD1P1	105	+
chr16	16444277	16444278	PKD1P1	90	+
chr16	16444210	16444211	PKD1P1	58	+
chr16	16444063	16444064	PKD1P1	52	+
chr16	16434356	16434357	PKD1P1	140	+
chr19	16302855	16302856	FAM32A	569	+
chr19	16302794	16302795	FAM32A	30	+
chr19	16302725	16302726	FAM32A	26	+
chr19	16302675	16302676	FAM32A	21	+
chr19	16301949	16301950	FAM32A	94	+
chr5	140391929	140391930	PCDHA8	16	+
chr5	140391164	140391165	PCDHA8	154	+
chr5	140389702	140389703	PCDHA8	23	+
chr5	140389438	140389439	PCDHA8	24	+
chr1	153527997	153527998	LOC101928034	14	+
chr1	153527833	153527834	LOC101928034	14	+
chr1	153524619	153524620	LOC101928034	5	+
chr15	65947061	65947062	DENND4A	7	-
chr15	65951466	65951467	DENND4A	8	-
chr15	65951690	65951691	DENND4A	36	-
chr15	65953923	65953924	DENND4A	19	-
chr15	65954118	65954119	DENND4A	113	-
chr8	125134429	125134430	FER1L6	28	+
chr8	125132299	125132300	FER1L6	18	+
chr17	6805495	6805496	ALOX12P2	10	+
chr17	6803660	6803661	ALOX12P2	11	+
chr17	57922031	57922032	VMP1	371	+
chr17	57919594	57919595	VMP1	9360	+
chr17	57919334	57919335	VMP1	250	+
chr17	57919238	57919239	VMP1	334	+
chr17	57918906	57918907	VMP1	532	+
chr17	57918633	57918634	VMP1	306	+
chr17	57917950	57917951	VMP1	2696	+
chr17	57917830	57917831	VMP1	160	+
chr17	57917700	57917701	VMP1	547	+
chr17	57917602	57917603	VMP1	150	+
chr17	57915758	57915759	VMP1	236	+
chr19	55555303	55555304	RDH13	35	-
chr19	55555706	55555707	RDH13	39	-
chrX	101138450	101138451	ZMAT1	3	-
chr3	178730406	178730407	ZMAT3	16	-
chr3	178735015	178735016	ZMAT3	48	-
chr3	178737835	178737836	ZMAT3	73	-
chr3	178738940	178738941	ZMAT3	8	-
chr3	178739046	178739047	ZMAT3	10	-
chr3	178739173	178739174	ZMAT3	10	-
chr3	178739337	178739338	ZMAT3	19	-
chr3	178739528	178739529	ZMAT3	25	-
chr3	178740622	178740623	ZMAT3	9	-
chr3	178740967	178740968	ZMAT3	28	-
chr3	178741194	178741195	ZMAT3	31	-
chr3	178741527	178741528	ZMAT3	19	-
chr3	178741864	178741865	ZMAT3	8	-
chr3	178742370	178742371	ZMAT3	9	-
chr3	178742769	178742770	ZMAT3	68	-
chr5	140086239	140086240	ZMAT2	178	+
chr5	140086134	140086135	ZMAT2	36	+
chr5	140086001	140086002	ZMAT2	332	+
chr5	140085876	140085877	ZMAT2	20	+
chr5	140085631	140085632	ZMAT2	104	+
chr5	140084090	140084091	ZMAT2	86	+
chr1	232176867	232176868	TSNAX-DISC1	10	+
chr1	231697011	231697012	TSNAX-DISC1	35	+
chr8	40388113	40388114	ZMAT4	7	-
chr19	1279226	1279227	C19orf24	1091	+
chr12	131274238	131274239	STX2	29	-
chr12	131275084	131275085	STX2	13	-
chr12	131276139	131276140	STX2	233	-
chr12	131276342	131276343	STX2	13	-
chr12	131283107	131283108	STX2	19	-
chr8	67474411	67474412	MYBL1	42	-
chr8	67476905	67476906	MYBL1	71	-
chr6	169068666	169068667	SMOC2	10	+
chr3	24022106	24022107	NR1D2	74	+
chr3	24020534	24020535	NR1D2	14	+
chr3	24019565	24019566	NR1D2	40	+
chr3	24019253	24019254	NR1D2	26	+
chr3	24019034	24019035	NR1D2	174	+
chr20	42345122	42345123	MYBL2	2472	+
chr20	42344999	42345000	MYBL2	45	+
chr20	42344820	42344821	MYBL2	20	+
chr20	42343882	42343883	MYBL2	11	+
chr20	42341701	42341702	MYBL2	12	+
chr20	42340241	42340242	MYBL2	9	+
chr20	42333998	42333999	MYBL2	15	+
chr20	42331536	42331537	MYBL2	10	+
chr2	9545802	9545803	ITGB1BP1	103	-
chr2	9546790	9546791	ITGB1BP1	685	-
chr2	9546924	9546925	ITGB1BP1	28	-
chrX	70525219	70525220	ITGB1BP2	14	+
chrX	90668936	90668937	PABPC5-AS1	3	-
chr8	146072892	146072893	ZNF7	31	+
chr8	146071777	146071778	ZNF7	11	+
chr8	146071588	146071589	ZNF7	5	+
chr8	146068605	146068606	ZNF7	161	+
chr2	95850062	95850063	ZNF2	22	+
chr2	95849989	95849990	ZNF2	4	+
chr2	95848715	95848716	ZNF2	8	+
chr7	99661654	99661655	ZNF3	11	-
chr7	99667600	99667601	ZNF3	191	-
chr7	99667800	99667801	ZNF3	201	-
chr20	56082266	56082267	CTCFL	4	-
chr20	56082432	56082433	CTCFL	4	-
chr7	100484285	100484286	UFSP1	9	-
chr7	100485878	100485879	UFSP1	22	-
chr7	100486346	100486347	UFSP1	11	-
chr16	28890279	28890280	ATP2A1-AS1	68	-
chr16	28890863	28890864	ATP2A1-AS1	7	-
chr22	43452790	43452791	LOC100506679	8	+
chr22	43449066	43449067	LOC100506679	12	+
chr22	43448561	43448562	LOC100506679	4	+
chr2	101622880	101622881	RPL31	43259	+
chr2	101622505	101622506	RPL31	489	+
chr2	101620719	101620720	RPL31	339	+
chr19	58808598	58808599	ZNF8	16	+
chr19	58807235	58807236	ZNF8	14	+
chr11	8937574	8937575	C11orf16	3	-
chr11	8941204	8941205	C11orf16	10	-
chr1	201433633	201433634	PHLDA3	145	-
chr1	201434623	201434624	PHLDA3	1353	-
chr1	201434756	201434757	PHLDA3	43	-
chr1	201434897	201434898	PHLDA3	36	-
chr1	201438158	201438159	PHLDA3	48	-
chr1	19935107	19935108	RPS14P3	23931	+
chr1	19934944	19934945	RPS14P3	132	+
chr3	123349659	123349660	MYLK-AS1	28	+
chr18	62094919	62094920	LOC284294	6	+
chr18	62094795	62094796	LOC284294	3	+
chr7	30445731	30445732	LINC01176	27	+
chr7	30444079	30444080	LINC01176	4	+
chr7	30443668	30443669	LINC01176	25	+
chr11	2949504	2949505	PHLDA2	10	-
chr11	2949651	2949652	PHLDA2	57	-
chr11	2949702	2949703	PHLDA2	11	-
chr5	137087263	137087264	HNRNPA0	65	-
chr5	137088307	137088308	HNRNPA0	262	-
chr5	137088559	137088560	HNRNPA0	67	-
chr5	137088828	137088829	HNRNPA0	25	-
chr5	137089838	137089839	HNRNPA0	16	-
chr20	61445351	61445352	OGFR	1051	+
chr20	61445147	61445148	OGFR	28	+
chr6	44414770	44414771	CDC5L	493	+
chr6	44394461	44394462	CDC5L	11	+
chr6	44374168	44374169	CDC5L	23	+
chr6	44374080	44374081	CDC5L	45	+
chr6	44371764	44371765	CDC5L	56	+
chr6	44371611	44371612	CDC5L	34	+
chr22	37621312	37621313	RAC2	151	-
chr22	37621397	37621398	RAC2	11	-
chr22	37621543	37621544	RAC2	12	-
chr22	37621604	37621605	RAC2	11	-
chr17	79996470	79996471	RAC3	12	+
chr17	79992079	79992080	RAC3	10	+
chr7	6443597	6443598	RAC1	1177	+
chr7	6442322	6442323	RAC1	1578	+
chr7	6442243	6442244	RAC1	1255	+
chr7	6442133	6442134	RAC1	14491	+
chr7	6442061	6442062	RAC1	233	+
chr7	66450050	66450051	SBDS	32	-
chr7	66452690	66452691	SBDS	130	-
chr7	66452765	66452766	SBDS	78	-
chr7	66453263	66453264	SBDS	17	-
chr12	52211683	52211684	FIGNL2	11	-
chr12	52213384	52213385	FIGNL2	4	-
chr10	75879912	75879913	VCL	365	+
chr10	75879769	75879770	VCL	514	+
chr10	75878970	75878971	VCL	42	+
chr10	75878378	75878379	VCL	78	+
chr10	75878147	75878148	VCL	150	+
chr19	10758178	10758179	ILF3-AS1	12	-
chr19	10758500	10758501	ILF3-AS1	16	-
chr19	10762541	10762542	ILF3-AS1	407	-
chr19	10762602	10762603	ILF3-AS1	28	-
chr19	10762806	10762807	ILF3-AS1	31	-
chr19	10763049	10763050	ILF3-AS1	349	-
chr19	10763236	10763237	ILF3-AS1	199	-
chr19	10763558	10763559	ILF3-AS1	31	-
chr6	43639045	43639046	MRPS18A	574	-
chr6	43639192	43639193	MRPS18A	538	-
chr5	175311023	175311024	CPLX2	8	+
chr4	777793	777794	CPLX1	8	-
chr4	778746	778747	CPLX1	45	-
chr19	50315364	50315365	AP2A1	23	+
chr19	50310367	50310368	AP2A1	331	+
chr19	50310171	50310172	AP2A1	35	+
chr11	1012239	1012240	AP2A2	93	+
chr11	1010919	1010920	AP2A2	305	+
chrX	7812183	7812184	VCX	1889	+
chrX	7811971	7811972	VCX	46	+
chrX	7811911	7811912	VCX	36	+
chrX	7811851	7811852	VCX	36	+
chr5	43193782	43193783	NIM1K	2	+
chr19	19671743	19671744	PBX4	6	-
chr19	19672524	19672525	PBX4	17	-
chr7	50511834	50511835	FIGNL1	166	-
chr7	50512175	50512176	FIGNL1	10	-
chr7	50512820	50512821	FIGNL1	79	-
chr6	32152510	32152511	PBX2	29	-
chr6	32153452	32153453	PBX2	305	-
chr6	32153571	32153572	PBX2	250	-
chr6	32153711	32153712	PBX2	46	-
chr6	32153902	32153903	PBX2	32	-
chr9	128729653	128729654	PBX3	30	+
chr9	128728689	128728690	PBX3	95	+
chr9	128728427	128728428	PBX3	61	+
chr9	128728336	128728337	PBX3	13	+
chr1	164821058	164821059	PBX1	35	+
chr1	164816308	164816309	PBX1	60	+
chr1	164816159	164816160	PBX1	8	+
chr1	164816060	164816061	PBX1	6	+
chr21	36407798	36407799	RUNX1-IT1	4	-
chr21	36410132	36410133	RUNX1-IT1	5	-
chr21	36410235	36410236	RUNX1-IT1	14	-
chr5	169847537	169847538	CTD-2270F17.1	3	+
chr3	93848034	93848035	NSUN3	6	+
chr3	93847342	93847343	NSUN3	6	+
chr3	93845630	93845631	NSUN3	17	+
chr3	93845532	93845533	NSUN3	18	+
chr3	93845425	93845426	NSUN3	16	+
chr5	6599353	6599354	NSUN2	209	-
chr5	6599488	6599489	NSUN2	86	-
chr5	6599830	6599831	NSUN2	18	-
chr5	6599951	6599952	NSUN2	18	-
chr7	72717212	72717213	NSUN5	967	-
chr7	72717423	72717424	NSUN5	25	-
chr1	46830690	46830691	NSUN4	51	+
chr1	46830004	46830005	NSUN4	35	+
chr1	46829813	46829814	NSUN4	13	+
chr1	46829748	46829749	NSUN4	6	+
chr1	46827862	46827863	NSUN4	143	+
chr4	40813200	40813201	NSUN7	4	+
chr4	40812594	40812595	NSUN7	5	+
chr4	40812000	40812001	NSUN7	5	+
chr4	40811895	40811896	NSUN7	14	+
chr4	40776875	40776876	NSUN7	18	+
chr10	18831830	18831831	NSUN6	11	-
chr10	18834491	18834492	NSUN6	12	-
chr10	18834823	18834824	NSUN6	20	-
chr10	18940197	18940198	NSUN6	9	-
chr17	40767254	40767255	TUBG1	1401	+
chr17	40767170	40767171	TUBG1	128	+
chr17	40767015	40767016	TUBG1	33	+
chr1	18401456	18401457	LOC101927876	13	+
chr17	40818476	40818477	TUBG2	10	+
chr17	40818219	40818220	TUBG2	18	+
chr17	40817816	40817817	TUBG2	5	+
chr17	40817542	40817543	TUBG2	5	+
chr7	128372463	128372464	FAM71F1	6	+
chr11	85666200	85666201	PICALM	14	-
chr11	85668714	85668715	PICALM	103	-
chr11	85668978	85668979	PICALM	17	-
chr11	85669658	85669659	PICALM	45	-
chr11	85669873	85669874	PICALM	15	-
chr1	12922095	12922096	PRAMEF2	3	+
chr7	128330455	128330456	FAM71F2	77	+
chr7	128328319	128328320	FAM71F2	9	+
chr7	128324654	128324655	FAM71F2	12	+
chr5	33470999	33471000	TARS	32	+
chr5	33468182	33468183	TARS	499	+
chr5	33468038	33468039	TARS	498	+
chr5	33467988	33467989	TARS	149	+
chr5	33467900	33467901	TARS	38	+
chr5	33467811	33467812	TARS	46	+
chr5	33467719	33467720	TARS	26	+
chr5	33467077	33467078	TARS	33	+
chr11	3526677	3526678	LOC101927708	8	-
chr11	3529365	3529366	LOC101927708	4	-
chr9	98205694	98205695	PTCH1	13	-
chr9	98208110	98208111	PTCH1	20	-
chr9	98208212	98208213	PTCH1	42	-
chr9	98208487	98208488	PTCH1	9	-
chr19	7991604	7991605	TIMM44	446	-
chr19	7991681	7991682	TIMM44	51	-
chr16	29838246	29838247	PAGR1	11	+
chr16	29837942	29837943	PAGR1	14	+
chr16	29835532	29835533	PAGR1	25	+
chr16	29835161	29835162	PAGR1	19	+
chr16	29833810	29833811	PAGR1	17	+
chr16	29831434	29831435	PAGR1	319	+
chr16	29831341	29831342	PAGR1	14	+
chr16	29828324	29828325	PAGR1	10	+
chr11	1616437	1616438	KRTAP5-2	11	-
chr11	125537534	125537535	ACRV1	17	-
chrX	57931731	57931732	ZXDA	6	-
chrX	57931866	57931867	ZXDA	5	-
chrX	57934022	57934023	ZXDA	11	-
chrX	57934205	57934206	ZXDA	25	-
chrX	57934828	57934829	ZXDA	6	-
chrX	57934915	57934916	ZXDA	4	-
chr19	55859487	55859488	KMT5C	105	+
chr11	67165874	67165875	RAD9A	406	+
chr12	123893898	123893899	KMT5A	104	+
chr12	123893647	123893648	KMT5A	12	+
chr12	123893051	123893052	KMT5A	31	+
chr12	123892758	123892759	KMT5A	11	+
chr12	123892461	123892462	KMT5A	26	+
chr12	123892329	123892330	KMT5A	9	+
chr6	132431738	132431739	MIR548AJ1	6	-
chr6	132434813	132434814	MIR548AJ1	10	-
chr20	34145404	34145405	ERGIC3	9955	+
chr20	34145248	34145249	ERGIC3	208	+
chr17	73003744	73003745	CDR2L	18	+
chr17	73001890	73001891	CDR2L	308	+
chr17	73001837	73001838	CDR2L	19	+
chr5	172379683	172379684	ERGIC1	925	+
chr5	172379523	172379524	ERGIC1	58	+
chr5	172379355	172379356	ERGIC1	46	+
chr5	172379239	172379240	ERGIC1	171	+
chr5	172377979	172377980	ERGIC1	64	+
chr8	27455246	27455247	CLU	115	-
chr8	27455331	27455332	CLU	86	-
chr8	27455514	27455515	CLU	19424	-
chr8	27455654	27455655	CLU	316	-
chr8	27455977	27455978	CLU	360	-
chr8	27457297	27457298	CLU	221	-
chr8	27462446	27462447	CLU	114	-
chr8	27466455	27466456	CLU	146	-
chr11	62382769	62382770	B3GAT3	391	-
chr11	62382918	62382919	B3GAT3	11	-
chr6	71571177	71571178	B3GAT2	5	-
chr8	12011701	12011702	FAM66D	5	+
chr8	12009796	12009797	FAM66D	4	+
chr8	12008698	12008699	FAM66D	31	+
chr8	7869160	7869161	FAM66E	2	+
chr8	7212331	7212332	FAM66B	4	-
chr12	8355483	8355484	FAM66C	15	+
chr12	8353575	8353576	FAM66C	8	+
chr12	8352475	8352476	FAM66C	17	+
chr8	12219952	12219953	FAM66A	3	+
chr5	90595837	90595838	LUCAT1	10	-
chr5	90596475	90596476	LUCAT1	5	-
chr5	90598553	90598554	LUCAT1	36	-
chr5	90598647	90598648	LUCAT1	10	-
chr5	90598848	90598849	LUCAT1	13	-
chr5	90608869	90608870	LUCAT1	34	-
chr2	47387309	47387310	CALM2	5462	-
chr2	47387461	47387462	CALM2	214	-
chr2	47387522	47387523	CALM2	114	-
chr2	47387728	47387729	CALM2	63	-
chr2	47389460	47389461	CALM2	99	-
chr19	47114038	47114039	CALM3	709	+
chr19	47113691	47113692	CALM3	118	+
chr19	47112560	47112561	CALM3	3671	+
chr2	178413771	178413772	TTC30B	7	-
chr2	178414883	178414884	TTC30B	5	-
chr19	50392000	50392001	TBC1D17	377	+
chr17	38134023	38134024	GSDMA	3	+
chr17	38133914	38133915	GSDMA	8	+
chr17	38057436	38057437	GSDMB	11	-
chr17	38060850	38060851	GSDMB	62	-
chr8	144645229	144645230	GSDMD	2259	+
[truncated: 61,353 more rows]
